# Supplementary material for: Functional Characterization of Variations on Regulatory Motifs
Source: PLoS Genet. 2008 Mar 7;4(3):e1000018. doi: 10.1371/journal.pgen.1000018 (PMC2265473; doi:10.1371/journal.pgen.1000018)
Supplement: Table S1 — Significantly scoring k-mers (our core set motifs). This table lists our core motif sequences, along with their EC scores and p-values in the biological condition in which each motif obtained the most significant score. For motifs that matched at least one of Harbison's PWMs with a match score higher than 99, the highest scoring match is also listed. (1.41 MB XLS) [file pgen.1000018.s010.xls]

## Sheet: Biological conditions
Biological conditions:
1 - ExpressDB cho-cell cycle
2 - ExpressDB chu-sporulation
3 - ExpressDB Environmental respons-Acid
4 - ExpressDB Environmental respons-Alkali
5 - ExpressDB Environmental respons-Heat
6 - ExpressDB Environmental respons-NaCl
7 - ExpressDB Environmental respons-Peroxide
8 - ExpressDB Environmental respons-Sorbitol
9 - Eisen - cold
10 - ExpressDB Gasch environmental respons- diaux shift
11 - Eisen - dtt
12 - Eisen - heat
13 - jelinsky - DNA Damage
14 - ExpressDB Gasch environmental respons- 37-25 shock
15 - ExpressDB Gasch environmental respons- Amino Acid starv
16 - ExpressDB Gasch environmental respons- diamide
17 - ExpressDB Gasch environmental respons- dtt1
18 - ExpressDB Gasch environmental respons- dtt2
19 - ExpressDB Gasch environmental respons- heat shock 1
20 - ExpressDB Gasch environmental respons- hs 29-33 1m sorbitol
21 - ExpressDB Gasch environmental respons- hs 29-33
22 - ExpressDB Gasch environmental respons- hs 29-33 No sorbitol
23 - ExpressDB Gasch environmental respons- hs2(3 time zero)
24 - ExpressDB Gasch environmental respons- constatnt h2o2
25 - ExpressDB Gasch environmental respons- Menadione
26 - ExpressDB Gasch environmental respons- Hypo-osmotic
27 - ExpressDB Gasch environmental respons- Nitrogen Deplation
28 - ExpressDB Gasch environmental respons- sorbitol
29 - ExpressDB Gasch environmental respons- hs various temp to 37c
30 - ExpressDB Gasch environmental respons- various temp growth
31 - ExpressDB Gasch environmental respons- var temp steady state
32 - ExpressDB Gasch environmental respons- x media vrs car1
33 - ExpressDB Gasch environmental respons- YPD1
34 - ExpressDB Gasch environmental respons- YPD2
35 - ExpressDB Gasch environmental respons- YPx media vrs car2
36 - EXPDB - MapK
37 - ExpressDB spellman cell-cycle alpha
38 - ExpressDB spellman cell-cycle cdc15
39 - ExpressDB spellman cell-cycle cdc28
40 - ExpressDB spellman cell-cycle eluteration

## Sheet: Significant k-mers
Significantly scoring k-mers
motif sequence	# genes for EC calculation	best EC score	best p-value	best condition	best matching Harbison PWM	conservation rate	included in filtered set?
AAAAAAAAAGT	70	0.13	4e-05	28		0.0390625	no
AAAAAAAGGGT	21	0.2	1e-05	3		0.16	no
AAAAAAGGCC	13	0.19	0.0028	16		0.1	no
AAAAAATAAAT	40	0.14	<E-05	39		0.111111	no
AAAAAATGAAA	64	0.12	6e-05	40		0.0131579	no
AAAAAATTCG	35	0.11	0.0041	19		0.0625	no
AAAAAATTT	292	0.14	<E-05	16		0.0958606	no
AAAAAATTTC	54	0.11	0.00071	28		0.188235	no
AAAAAATTTCA	48	0.19	<E-05	15		0.229167	no
AAAAAATTTT	208	0.19	<E-05	10		0.251208	yes
AAAAAATTTTT	74	0.2	<E-05	10		0.205128	no
AAAAACCTCGT	6	0.53	7e-05	39		1	yes
AAAAACGCG	31	0.2	<E-05	1		0.325	yes
AAAAACTTTT	45	0.19	<E-05	7		0.170732	no
AAAAACTTTTC	16	0.31	<E-05	19		0.416667	yes
AAAAAGAGTGA	6	0.53	0.00041	5		0.25	yes
AAAAAGCATG	14	0.19	0.00072	1		0.0526316	no
AAAAAGGGG	43	0.22	<E-05	4		0.152174	no
AAAAAGTTTC	38	0.13	2e-05	39		0.159091	no
AAAAAGTTTT	48	0.1	0.00268	35		0.1	no
AAAAATAAAGG	34	0.12	0.00277	27		0.185185	no
AAAAATAATCA	14	0.37	<E-05	39		0.0769231	no
AAAAATACCAC	5	0.8	1e-05	1		0	no
AAAAATCAG	40	0.11	0.00019	3		0.0408163	no
AAAAATCCC	22	0.18	5e-05	3		0.148148	no
AAAAATGAAA	96	0.1	0.00133	16		0.04375	no
AAAAATGAAAA	72	0.11	0.00035	16		0.0373832	no
AAAAATGGGCT	6	0.67	<E-05	16		0.2	no
AAAAATTT	322	0.12	<E-05	26		0.183539	no
AAAAATTTC	158	0.13	1e-05	16		0.183761	no
AAAAATTTCA	109	0.19	<E-05	15		0.352459	yes
AAAAATTTCAC	14	0.4	<E-05	15		0.428571	yes
AAAAATTTCAG	21	0.28	<E-05	15		0.208333	no
AAAAATTTCAT	39	0.19	<E-05	23		0.243243	yes
AAAAATTTT	433	0.16	<E-05	10		0.212174	no
AAAAATTTTA	41	0.14	<E-05	25		0.342105	yes
AAAAATTTTAT	24	0.25	<E-05	7		0.333333	yes
AAAAATTTTCC	30	0.3	<E-05	15		0.555556	yes
AAAAATTTTG	49	0.25	<E-05	16		0.338028	yes
AAAAATTTTGA	18	0.35	<E-05	16		0.344828	yes
AAAAATTTTT	118	0.2	<E-05	10		0.333333	yes
AAAAATTTTTA	21	0.33	<E-05	15		0.142857	no
AAAAATTTTTC	70	0.29	<E-05	10		0.423077	yes
AAAACAAACA	47	0.12	<E-05	1		0.24	no
AAAACAACAA	54	0.16	<E-05	2		0.178571	no
AAAACAGCT	32	0.09	0.00647	3		0.125	no
AAAACATATAA	14	0.26	3e-05	1		0.0666667	no
AAAACCGA	67	0.09	0.00116	39		0.141026	no
AAAACCGG	50	0.09	0.00116	39		0.1375	no
AAAACCTCGTA	5	0.8	1e-05	1		0	no
AAAACGCG	66	0.24	<E-05	1		0.193548	no
AAAACGCGA	27	0.3	<E-05	1		0.225806	no
AAAACGCGAA	16	0.39	<E-05	1		0.473684	yes
AAAACGCGAAA	10	0.49	<E-05	1	STB1	0.7	yes
AAAACGCGT	29	0.47	<E-05	1		0.228571	no
AAAACGCGTA	6	0.87	<E-05	37		0.333333	yes
AAAACGCGTAA	5	1	<E-05	37		0.333333	yes
AAAACGCGTC	11	0.55	<E-05	1	MBP1	0.555556	yes
AAAACGCGTT	6	0.4	0.00118	39		0.0833333	no
AAAACTAGAA	15	0.3	<E-05	1		0.047619	no
AAAACTCAC	22	0.14	0.00206	34		0	no
AAAACTGTGG	17	0.32	1e-05	15	MET31	0.4	yes
AAAACTTTTC	32	0.19	1e-05	23		0.314286	yes
AAAAGATAGA	13	0.27	1e-05	3		0.0588235	no
AAAAGCACTTA	6	0.67	<E-05	39		0.166667	no
AAAAGCATG	36	0.1	0.00196	1		0.0238095	no
AAAAGCCCAA	6	0.8	<E-05	13		0	no
AAAAGCGGG	19	0.18	0.00013	3		0.206897	no
AAAAGGGAT	37	0.09	0.00377	3		0.0983607	no
AAAAGGGGA	48	0.13	3e-05	4	MSN4	0.159091	no
AAAAGGGGC	20	0.21	<E-05	20	MSN4	0.242424	yes
AAAAGGGT	146	0.07	0.01646	3		0.147783	no
AAAAGGGTC	28	0.14	7e-05	39		0.210526	no
AAAAGGGTGA	10	0.44	<E-05	6		0.363636	yes
AAAAGTAAACA	8	0.25	0.00594	40	FKH2	0.375	yes
AAAAGTGTCC	6	0.47	7e-05	39		0	no
AAAATAATCAT	10	0.4	3e-05	39		0.0714286	no
AAAATCAGGCG	7	0.48	2e-05	39		0	no
AAAATCAGT	28	0.16	3e-05	3		0	no
AAAATCCA	92	0.07	0.01646	3		0.0487805	no
AAAATCCAA	45	0.09	0.00111	3		0.0238095	no
AAAATCCC	64	0.12	1e-05	3		0.109756	no
AAAATCCG	52	0.08	0.00382	3		0.105882	no
AAAATCTGGA	14	0.18	0.00046	20		0.153846	no
AAAATGGTGCT	5	0.8	1e-05	1		0	no
AAAATGTACG	13	0.35	<E-05	14		0.133333	no
AAAATGTATGG	5	0.9	1e-05	16		0	no
AAAATTAC	175	0.06	0.06862	3		0.0493827	no
AAAATTTCA	144	0.14	<E-05	16		0.199153	no
AAAATTTCAA	44	0.18	<E-05	16		0.292683	yes
AAAATTTCAG	29	0.2	<E-05	16		0.295455	yes
AAAATTTCAT	56	0.13	2e-05	19		0.227273	no
AAAATTTCATC	23	0.25	<E-05	17		0.333333	yes
AAAATTTGCAA	6	0.67	1e-05	15		0.25	yes
AAAATTTT	393	0.19	<E-05	16		0.262821	yes
AAAATTTTA	69	0.15	<E-05	25		0.186747	no
AAAATTTTAAT	10	0.09	0.11662	19		0.153846	no
AAAATTTTAG	11	0.38	1e-05	25		0.333333	yes
AAAATTTTAT	40	0.21	<E-05	18		0.259259	yes
AAAATTTTCAA	54	0.23	<E-05	15		0.413043	yes
AAAATTTTCAT	38	0.23	<E-05	10		0.466667	yes
AAAATTTTCC	49	0.23	<E-05	15		0.4	yes
AAAATTTTCGC	12	0.39	<E-05	7		0.444444	yes
AAAATTTTCTA	17	0.32	<E-05	7		0.133333	no
AAAATTTTG	74	0.19	<E-05	16		0.10687	no
AAAATTTTGAA	24	0.2	4e-05	7		0.2	no
AAAATTTTGAG	8	0.71	<E-05	18		0.142857	no
AAAATTTTTA	55	0.19	<E-05	15		0.177778	no
AAAATTTTTC	225	0.19	<E-05	10		0.618026	yes
AAAATTTTTCA	158	0.21	<E-05	10		0.689655	yes
AAAATTTTTCC	15	0.35	<E-05	7		0.2	no
AAAATTTTTCT	52	0.21	<E-05	10		0.232558	no
AAAATTTTTG	47	0.17	<E-05	18		0.34	yes
AAAATTTTTTC	55	0.18	<E-05	10		0.294118	yes
AAAATTTTTTG	10	0.6	<E-05	16		0.1875	no
AAAATTTTTTT	134	0.18	<E-05	10		0.158416	no
AAACAAACAAA	22	0.19	3e-05	1		0.166667	no
AAACAAATTGA	5	0.9	<E-05	14		0	no
AAACAACAA	107	0.15	1e-05	2	SIG1	0.0743802	no
AAACAACAAA	41	0.26	<E-05	2		0.0666667	no
AAACAACAAAA	23	0.26	<E-05	2		0	no
AAACAACAAAC	9	0.33	0.00015	39		0	no
AAACAACCCT	9	0.36	4e-05	39		0	no
AAACAACTC	18	0.18	0.00012	3		0	no
AAACAATCA	35	0.09	0.00441	3		0.025	no
AAACACGA	53	0.07	0.01646	3		0.1875	no
AAACACGAA	15	0.27	1e-05	25		0.25	yes
AAACACGAT	13	0.19	0.00127	3		0.16	no
AAACAGCT	74	0.07	0.01646	3		0.0515464	no
AAACAGGGG	9	0.42	7e-05	19		0.533333	yes
AAACAGTC	39	0.09	0.00281	3		0.0151515	no
AAACATCA	90	0.07	0.01646	3		0.0214286	no
AAACATCAT	22	0.17	9e-05	3		0.0277778	no
AAACATTACC	6	0.8	<E-05	1		0	no
AAACATTGG	10	0.38	<E-05	1	HAP2	0	no
AAACATTTA	43	0.09	0.0014	3		0.0273973	no
AAACCACGT	7	0.48	<E-05	3		0.2	no
AAACCAGGA	18	0.25	<E-05	14		0.0526316	no
AAACCCAAAC	10	0.53	<E-05	32		0.0833333	no
AAACCCAAACA	10	0.44	<E-05	35		0.125	no
AAACCCC	73	0.07	0.00981	20		0.0774194	no
AAACCCCG	21	0.18	6e-05	3	ADR1	0.0294118	no
AAACCCTG	29	0.07	0.05533	3		0.142857	no
AAACCGG	101	0.07	0.01652	3	UGA3	0.122699	no
AAACCTAG	33	0.12	0.00021	3		0.0425532	no
AAACCTCG	43	0.09	0.0014	3		0.105263	no
AAACCTCGTA	5	0.8	1e-05	1		0	no
AAACCTCGTAT	5	0.8	1e-05	1		0	no
AAACCTGC	41	0.06	0.08577	3		0	no
AAACGAAGCT	7	0.52	2e-05	39		0	no
AAACGAAGCTT	7	0.52	2e-05	39		0	no
AAACGCCA	23	0.15	0.00039	37		0.184783	no
AAACGCGAAA	24	0.31	<E-05	1	STB1	0.6	yes
AAACGCGT	72	0.26	<E-05	1		0.208333	no
AAACGCGTA	19	0.27	<E-05	37		0.16	no
AAACGCGTAA	16	0.33	<E-05	1		0.266667	yes
AAACGCGTC	23	0.43	<E-05	1	MBP1	0.434783	yes
AAACGCGTT	15	0.31	<E-05	1		0	no
AAACGCGTTA	11	0.31	3e-05	39		0.2	no
AAACGGACG	6	0.4	0.00245	40		0	no
AAACGTTA	65	0.09	0.0013	1		0.0315789	no
AAACGTTC	43	0.07	0.02304	3		0.025974	no
AAACTACA	120	0.06	0.06862	3		0.0451613	no
AAACTAGAA	28	0.13	0.00019	39		0	no
AAACTAGGA	19	0.25	<E-05	2		0	no
AAACTATAT	51	0.07	0.01646	3		0.0298507	no
AAACTATTA	35	0.12	0.00015	39		0.0925926	no
AAACTCCAGG	8	0.39	9e-05	39	ADR1	0.2	no
AAACTCCAGGT	7	0.48	2e-05	39	ADR1	0	no
AAACTCCG	36	0.11	0.0003	3	ADR1	0.163265	no
AAACTCGGT	5	0.7	2e-05	1		0	no
AAACTCTC	52	0.06	0.06862	3		0.0357143	no
AAACTGGTA	22	0.15	0.00027	3		0.0344828	no
AAACTGTG	80	0.06	0.06862	3	MET31	0.185841	no
AAACTGTGG	36	0.2	<E-05	15	MET31	0.333333	yes
AAACTTCG	63	0.07	0.01646	3		0.0405405	no
AAACTTCGA	10	0.42	<E-05	26		0	no
AAACTTCTC	30	0.12	0.0004	3		0.027027	no
AAACTTTAGC	5	1	1e-05	2		0	no
AAAGAAAAATT	51	0.14	1e-05	7		0.104167	no
AAAGAAACC	29	0.11	0.00135	25		0.0441176	no
AAAGAACAT	52	0.08	0.00382	3		0.0149254	no
AAAGACCGT	7	0.48	2e-05	14		0	no
AAAGAGTCA	22	0.13	0.00344	40	BAS1	0.318182	yes
AAAGCAACGTA	6	0.67	<E-05	39		0	no
AAAGCCCC	21	0.09	0.028	3		0.0588235	no
AAAGCCCCA	6	0.2	0.04351	3		0.0833333	no
AAAGCCCCT	14	0.21	0.00015	39		0	no
AAAGCTAT	86	0.07	0.01646	3		0.0431034	no
AAAGCTCCCAA	5	1	<E-05	33		0	no
AAAGCTGTC	24	0.2	4e-05	2		0.107143	no
AAAGGAAATAG	11	0.27	0.00022	39		0.0769231	no
AAAGGAGAG	44	0.1	0.00035	3		0.0188679	no
AAAGGAGC	68	0.07	0.01646	3		0.0666667	no
AAAGGAGCA	24	0.15	0.00012	39		0.0277778	no
AAAGGAGCG	14	0.23	0.00087	27		0	no
AAAGGAGTA	33	0.08	0.01436	3	ADR1	0.09375	no
AAAGGATATA	12	0.32	2e-05	3		0.0666667	no
AAAGGGAC	62	0.08	0.00382	3		0.0851064	no
AAAGGGAGT	22	0.11	0.00471	3	ADR1	0.115385	no
AAAGGGAT	82	0.09	0.0007	3		0.129771	no
AAAGGGGC	47	0.12	<E-05	20	MSN4	0.252747	yes
AAAGGGGCA	22	0.16	0.00019	3	MSN4	0.133333	no
AAAGGGT	318	0.07	0.01652	3		0.170626	no
AAAGGGTA	94	0.06	0.06862	3		0.166667	no
AAAGGTATATA	16	0.22	3e-05	1	MOT3	0.222222	no
AAAGTAAACA	18	0.16	0.00169	40	FKH2	0.178571	no
AAAGTAGAG	34	0.14	0.00024	7		0	no
AAAGTGATT	35	0.12	0.00016	1		0.0212766	no
AAAGTGCG	34	0.1	0.00144	3		0.0816327	no
AAAGTGCTTA	8	0.32	0.00049	39		0	no
AAAGTGGG	46	0.07	0.01966	3	MET4	0.0491803	no
AAAGTTGCAC	7	0.48	2e-05	1		0	no
AAAGTTTG	100	0.06	0.06862	3		0.0285714	no
AAAGTTTTCT	12	0.29	0.00014	34		0	no
AAATAAACC	23	0.1	0.00932	25		0.0196078	no
AAATAAATTAT	15	0.25	3e-05	1		0.0666667	no
AAATAAGCAAC	5	0.8	1e-05	1		0	no
AAATAAGGGG	7	0.62	<E-05	3		0.444444	yes
AAATAATCA	60	0.1	0.00018	39		0.0416667	no
AAATACTTC	35	0.12	0.00016	1		0.0363636	no
AAATATCGG	14	0.25	4e-05	39	HAP1	0	no
AAATATTATA	38	0.11	0.00024	3		0.0689655	no
AAATCACG	50	0.06	0.06862	3		0.0945946	no
AAATCAGGCG	8	0.36	9e-05	39		0	no
AAATCAGGCGT	6	0.67	<E-05	39		0	no
AAATCAGTGC	6	0.67	<E-05	1		0	no
AAATCAGTGCA	6	0.67	<E-05	39		0	no
AAATCATGAC	7	0.67	1e-05	34		0	no
AAATCCC	132	0.08	0.00366	3		0.103825	no
AAATCCCT	51	0.09	0.0007	3		0.129032	no
AAATCCGTAC	8	0.75	<E-05	15		0.125	no
AAATCCGTACA	6	0.73	<E-05	16		0.166667	no
AAATCGATG	23	0.19	7e-05	16		0.176471	no
AAATCGTTAT	11	0.36	3e-05	24		0	no
AAATCTCG	38	0.06	0.09636	3		0.0615385	no
AAATCTCT	81	0.1	0.00014	3		0.016129	no
AAATGAAAAAT	62	0.13	<E-05	24		0.197183	no
AAATGAATT	53	0.1	0.00559	15		0.0327869	no
AAATGACCCA	5	1	<E-05	17		0.5	yes
AAATGACG	60	0.08	0.00382	3		0.0681818	no
AAATGAGA	116	0.08	0.00382	3		0.0128205	no
AAATGAGAA	51	0.12	1e-05	3		0.0307692	no
AAATGATCG	31	0.16	4e-05	34		0.0689655	no
AAATGATCGG	6	0.67	1e-05	10		0	no
AAATGCGA	55	0.08	0.00572	25		0.0697674	no
AAATGCGAT	41	0.18	<E-05	7		0.09375	no
AAATGCGATG	16	0.41	<E-05	16		0.2	no
AAATGCTCAT	7	0.62	<E-05	16		0.111111	no
AAATGCTGACC	6	0.67	<E-05	39	SWI5	0.166667	no
AAATGGGA	27	0.13	0.00266	28		0.0375	no
AAATGGTGCTG	6	0.53	7e-05	39		NA	yes
AAATGTACG	16	0.34	<E-05	11		0.0810811	no
AAATGTATG	44	0.14	<E-05	14		0.0681818	no
AAATGTATGGA	6	1	<E-05	15		0.5	yes
AAATTACGG	8	0.21	0.0088	3		0.0555556	no
AAATTGAAAAT	24	0.22	1e-05	7		0.157895	no
AAATTGATG	47	0.14	<E-05	8		0.0263158	no
AAATTGATGA	16	0.28	<E-05	8		0.0714286	no
AAATTTCAGA	25	0.15	0.00039	24		0.166667	no
AAATTTCATC	39	0.19	<E-05	19		0.257143	yes
AAATTTGAA	51	0.13	4e-05	28		0.0185185	no
AAATTTGAAA	24	0.17	0.0004	28		0.0634921	no
AAATTTGGAA	17	0.32	1e-05	18		0	no
AAATTTTAG	27	0.15	4e-05	25		0.0689655	no
AAATTTTCAAA	25	0.21	0.00011	15		0.142857	no
AAATTTTCAGT	18	0.25	<E-05	24		0.375	yes
AAATTTTCAT	58	0.16	<E-05	10		0.421053	yes
AAATTTTCC	79	0.15	<E-05	29		0.141304	no
AAATTTTCCG	17	0.24	<E-05	24	RGT1	0.411765	yes
AAATTTTCGC	18	0.22	9e-05	7		0.615385	yes
AAATTTTGAA	41	0.16	1e-05	23		0.119048	no
AAATTTTGAAA	26	0.21	<E-05	10		0.16	no
AAATTTTGAG	19	0.32	<E-05	18		0.133333	no
AAATTTTGCGA	6	0.67	<E-05	16		0.4	yes
AAATTTTTC	269	0.22	<E-05	16		0.303828	yes
AAATTTTTCA	257	0.17	<E-05	10		0.669388	yes
AAATTTTTCAA	72	0.2	<E-05	10		0.478261	yes
AAATTTTTCAC	59	0.22	<E-05	10		0.714286	yes
AAATTTTTCAT	77	0.24	<E-05	15		0.597222	yes
AAATTTTTCT	59	0.15	<E-05	16		0.16092	no
AAATTTTTCTT	32	0.2	<E-05	16		0.217391	no
AAATTTTTG	48	0.12	<E-05	25		0.0775862	no
AAATTTTTTC	90	0.18	<E-05	15		0.227273	no
AAATTTTTTCT	39	0.18	<E-05	7		0.0571429	no
AAATTTTTTT	182	0.13	<E-05	40		0.125	no
AAATTTTTTTC	57	0.17	<E-05	16		0.125	no
AAATTTTTTTT	65	0.12	<E-05	25		0.0810811	no
AACAACCT	53	0.06	0.06862	3		0.015625	no
AACAACTA	80	0.07	0.01646	3		0.0173913	no
AACAATATTCT	8	0.64	<E-05	1		0	no
AACAATCTC	18	0.17	0.00018	3		0	no
AACAATGT	71	0.06	0.06862	3		0.0408163	no
AACAATGTG	15	0.14	0.00471	3		0.0454545	no
AACACACAAAC	7	0.48	2e-05	39		0.5	yes
AACACACCA	8	0.29	0.00042	25		0.133333	no
AACACATGA	15	0.32	<E-05	2		0	no
AACACCCA	67	0.13	4e-05	7		0.33871	yes
AACACCTA	40	0.1	0.00071	3		0	no
AACACCTC	25	0.09	0.01682	3		0	no
AACACGAA	49	0.11	0.00034	40		0.23913	no
AACACGAAA	18	0.22	1e-05	37		0.355556	yes
AACACGTC	30	0.14	0.00039	7		0.25	yes
AACACTAAT	22	0.14	0.00057	3		0.0333333	no
AACACTGC	20	0.24	4e-05	28		0.0487805	no
AACACTTA	48	0.06	0.07418	3		0.0166667	no
AACAGAACCA	7	0.67	<E-05	17		0.222222	no
AACAGAATAA	7	0.67	<E-05	40		0	no
AACAGACC	26	0.07	0.07349	3		0.08	no
AACAGACGT	4	0.67	0.00017	39		0	no
AACAGAGG	43	0.06	0.08097	3		0	no
AACAGGAT	42	0.08	0.00682	3		0.0192308	no
AACAGGCA	47	0.08	0.00402	3	MOT3	0.0519481	no
AACAGGG	55	0.1	0.00046	37		0.0932642	no
AACAGGGG	25	0.13	0.00066	39		0.228571	no
AACAGGTG	39	0.07	0.03179	3		0.0327869	no
AACAGTTA	73	0.08	0.00382	3		0.032967	no
AACATAAG	71	0.07	0.01646	3		0.0176991	no
AACATATATTC	6	0.67	<E-05	1		0.142857	no
AACATCAT	68	0.06	0.06862	3		0.039604	no
AACATCCGTA	11	0.42	1e-05	15		0.214286	no
AACATCCGTAC	10	0.49	<E-05	13		0.2	no
AACATCCTAT	6	0.73	1e-05	13		0	no
AACATCTAT	36	0.12	0.00295	33		0	no
AACATGAA	49	0.09	0.00099	25		0.0214286	no
AACATGGC	22	0.11	0.00471	3		0.0625	no
AACATGTT	29	0.08	0.02202	3		0.0930233	no
AACATTGTC	15	0.22	0.00013	3		0	no
AACCAAGG	52	0.09	0.00116	39		0.0727273	no
AACCAGTC	21	0.07	0.10159	3		0.0277778	no
AACCATAAA	36	0.14	0.00011	10		0.0512821	no
AACCATAC	52	0.09	0.00428	24		0.031746	no
AACCATAGTT	6	0.73	1e-05	15		0	no
AACCATTTCTC	7	0.48	2e-05	39		0.5	yes
AACCCAAAC	10	0.58	<E-05	12		0.185185	no
AACCCAGC	10	0.11	0.07396	3		0	no
AACCCCG	53	0.15	<E-05	3	ADR1	0.172043	no
AACCCCGC	13	0.23	0.00026	3	ADR1	0.222222	no
AACCCCGG	9	0.19	0.00765	3	ADR1	0.277778	yes
AACCCCGTC	5	0.9	1e-05	31	ADR1	0	no
AACCCCTAT	8	0.36	0.00015	3	ADR1	0.0833333	no
AACCCGCA	7	0.33	0.00263	28		0.375	yes
AACCCGG	61	0.11	2e-05	3	UGA3	0.0918367	no
AACCCGGA	29	0.16	2e-05	3		0.138889	no
AACCCTCA	16	0.13	0.00553	3		0.0869565	no
AACCCTG	71	0.08	0.00366	3		0.124031	no
AACCCTTT	111	0.08	0.00382	3		0.0965517	no
AACCCTTTTTT	14	0.23	0.00011	3		0.307692	yes
AACCGGA	75	0.08	0.00366	3		0.0827068	no
AACCGGAA	38	0.08	0.00963	3		0.0833333	no
AACCGGAG	13	0.15	0.00565	3		0.107143	no
AACCGGAGA	8	0.25	0.00315	3		0.0909091	no
AACCGGC	47	0.1	0.00032	1		0.084507	no
AACCGTAA	48	0.12	0.00035	27		0.0333333	no
AACCGTTT	47	0.1	0.0003	3		0.0649351	no
AACCTACATG	7	0.48	2e-05	39		0	no
AACCTACATGA	6	0.67	<E-05	39		0	no
AACCTAG	92	0.07	0.01652	3		0.0384615	no
AACCTATACA	7	0.67	<E-05	17		0.3	yes
AACCTATCA	9	0.42	3e-05	10		0	no
AACCTCAT	34	0.13	5e-05	25		0.116883	no
AACCTCATC	26	0.22	<E-05	24		0.409091	yes
AACCTCATCG	16	0.28	2e-05	7		1	yes
AACCTCCA	39	0.09	0.00281	3	ADR1	0	no
AACCTCCG	11	0.18	0.00518	1	ADR1	0.047619	no
AACCTCCGT	4	1	5e-05	40	ADR1	0	no
AACCTCG	92	0.09	0.00067	3		0.1	no
AACCTCGG	27	0.14	0.00184	17		0	no
AACCTCGT	29	0.08	0.02202	3		0.166667	no
AACCTCGTA	8	0.43	1e-05	1		0	no
AACCTCGTAT	7	0.57	1e-05	1		0	no
AACCTCGTATT	6	0.53	7e-05	39		0	no
AACCTGGT	22	0.08	0.04314	3		0.027027	no
AACCTTAA	47	0.07	0.01229	20		0.108911	no
AACGAAGCTTT	6	0.67	<E-05	39		0	no
AACGAATC	30	0.07	0.05365	3		0.0232558	no
AACGAATT	60	0.09	0.0007	3		0.00970874	no
AACGACAAG	19	0.19	6e-05	3		0.117647	no
AACGAGAC	19	0.11	0.0098	3		0.0952381	no
AACGATAC	39	0.08	0.00842	3		0.0408163	no
AACGATAT	75	0.07	0.01646	3		0.0512821	no
AACGCATTG	10	0.16	0.00656	21		0	no
AACGCCAAA	41	0.12	5e-05	39		0.301887	yes
AACGCGAAA	48	0.22	<E-05	1	STB1	0.423077	yes
AACGCGAAAA	29	0.26	<E-05	1	SWI6	0.576923	yes
AACGCGACGC	9	0.36	6e-05	1		0.5	yes
AACGCGACGCG	8	0.43	1e-05	1		0.6	yes
AACGCGCCA	10	0.29	0.00018	1		0.111111	no
AACGCGCCAA	8	0.46	1e-05	1		0.333333	yes
AACGCGG	43	0.05	0.40051	20	STP1	0.117647	no
AACGCGGTT	7	0.62	<E-05	1		0	no
AACGCGT	134	0.21	<E-05	1		0.320574	yes
AACGCGTA	44	0.16	<E-05	1		0.3	yes
AACGCGTAA	25	0.35	<E-05	1		0.25	yes
AACGCGTC	51	0.26	<E-05	1	MBP1	0.345455	yes
AACGCGTCC	8	0.25	0.00372	1	MBP1	0.181818	no
AACGCGTG	23	0.19	3e-05	1		0.172414	no
AACGCGTT	24	0.35	<E-05	1		0.102564	no
AACGCGTTA	14	0.45	<E-05	1		0.125	no
AACGCGTTAG	7	0.57	1e-05	39		0.25	yes
AACGCTAA	48	0.05	0.24568	3		0.016129	no
AACGCTAAA	19	0.25	<E-05	2		0	no
AACGGAGT	20	0.18	7e-05	3	ADR1	0.0416667	no
AACGGAGTT	9	0.33	0.00017	3	ADR1	0.111111	no
AACGGGCCA	10	0.33	0.00012	39		0.0909091	no
AACGGGCCAA	7	0.48	2e-05	39		0.125	no
AACGGTT	139	0.08	0.00366	3		0.0762332	no
AACGGTTT	49	0.07	0.01634	3		0.0857143	no
AACGTAAC	44	0.11	9e-05	3		0.047619	no
AACGTAGGA	13	0.23	0.00077	7		0	no
AACGTCCTTT	6	0.67	1e-05	13		0	no
AACGTCG	65	0.07	0.01652	3		0.0731707	no
AACGTGCG	20	0.1	0.02504	14		0.172414	no
AACGTGT	112	0.06	0.06893	3		0.112903	no
AACGTTAA	74	0.09	0.0007	3		0.0353982	no
AACGTTAAG	13	0.21	0.0004	3		0	no
AACGTTAGT	11	0.24	0.00035	1		0.1	no
AACGTTCG	12	0.29	5e-05	1		0.0526316	no
AACGTTCT	59	0.12	1e-05	3	HSF1	0.0588235	no
AACGTTTG	37	0.09	0.00377	3		0.0133333	no
AACTAAGC	41	0.09	0.003	39		0.0294118	no
AACTAAGTA	25	0.12	0.01076	15		0.0454545	no
AACTACGTT	15	0.28	1e-05	8		0	no
AACTAGAC	36	0.12	0.00011	3		0.0212766	no
AACTAGCAGA	5	0.8	1e-05	1		1	yes
AACTAGCAGAA	5	0.8	1e-05	1		NA	yes
AACTAGGA	44	0.15	<E-05	2		0.02	no
AACTAGGGG	6	0.33	0.00392	3		0.1	no
AACTATAACA	12	0.27	9e-05	39		0.1	no
AACTATAT	53	0.1	0.00041	26		0.0406091	no
AACTATCCC	10	0.29	0.00018	1		0	no
AACTATCT	63	0.09	0.0007	3		0.010989	no
AACTATGAAAT	6	0.53	7e-05	39		0	no
AACTATTCTA	9	0.61	<E-05	10		0	no
AACTCAG	117	0.05	0.2364	3		0.0574713	no
AACTCAGT	37	0.07	0.03604	3		0.0232558	no
AACTCATC	39	0.15	4e-05	28		0.156627	no
AACTCATCT	22	0.1	0.0319	19		0.0869565	no
AACTCCAGGTG	6	0.67	<E-05	39	ADR1	0	no
AACTCCCTTA	5	0.6	0.00041	1	ADR1	0	no
AACTCCG	97	0.08	0.00366	3	ADR1	0.174825	no
AACTCCGA	29	0.08	0.02202	3	ADR1	0.159091	no
AACTCCGT	27	0.09	0.01131	3	ADR1	0.0571429	no
AACTCCTC	12	0.27	0.00018	26	ADR1	0.0294118	no
AACTCTCG	23	0.09	0.01294	20		0.0555556	no
AACTGAAAA	86	0.08	0.02071	40		0.0322581	no
AACTGAAAAA	53	0.09	0.00507	40		0.121622	no
AACTGACGC	8	0.54	<E-05	7		0.142857	no
AACTGATT	65	0.08	0.00382	3		0.043956	no
AACTGGGGAT	6	0.67	<E-05	34		0	no
AACTGTAA	59	0.09	0.00507	40		0.0514706	no
AACTGTAG	52	0.07	0.01646	3		0.0136986	no
AACTGTATG	19	0.17	0.00017	3		0.1	no
AACTGTGG	65	0.13	0.00022	15	MET31	0.315068	yes
AACTTAACT	29	0.17	5e-05	7		0	no
AACTTACG	53	0.08	0.01972	7		0.0217391	no
AACTTCACC	11	0.33	5e-05	19		0	no
AACTTCAT	39	0.11	3e-05	20		0.0595238	no
AACTTCGA	57	0.07	0.01646	3		0.0149254	no
AACTTGCC	38	0.12	0.0001	3		0	no
AACTTGCCC	8	0.39	0.00015	3		0	no
AACTTTCACTT	7	0.48	2e-05	39		0.25	yes
AACTTTCG	41	0.09	0.0019	3		0.0357143	no
AACTTTCGA	16	0.17	0.00064	3		0	no
AAGAAAAAATT	51	0.14	1e-05	7		0.0930233	no
AAGAAAAATT	47	0.16	1e-05	16		0.134021	no
AAGAAAATTT	65	0.13	2e-05	19		0.103896	no
AAGAAAATTTT	35	0.2	<E-05	19		0.119048	no
AAGAAACCA	16	0.28	6e-05	28		0.0697674	no
AAGAAATTC	59	0.1	0.0012	8		0.0612245	no
AAGAATGT	85	0.06	0.06862	3	TEC1	0.123894	no
AAGAATTATT	13	0.27	1e-05	3		0.176471	no
AAGACATA	63	0.08	0.00382	3		0.0510204	no
AAGACGAG	36	0.09	0.00385	3		0.0222222	no
AAGACGG	101	0.07	0.01652	3	STP1	0.0519481	no
AAGACGGA	41	0.08	0.00735	3		0.0816327	no
AAGACGTCC	9	0.28	0.00034	39		0	no
AAGACGTT	54	0.1	0.00014	3		0.012987	no
AAGACGTTG	13	0.23	0.00026	3		0	no
AAGACTTCT	16	0.23	2e-05	1		0	no
AAGAGACC	30	0.09	0.00765	3		0	no
AAGAGATGAG	17	0.15	0.00148	22		0.590909	yes
AAGAGCTT	73	0.07	0.01646	3		0.00952381	no
AAGAGGAACTG	10	0.36	4e-05	39		0	no
AAGAGGGG	37	0.14	1e-05	3		0.183333	no
AAGAGGGGA	26	0.19	2e-05	6		0.25	yes
AAGAGGGGT	10	0.38	6e-05	19	ADR1	0.0666667	no
AAGAGTAC	54	0.1	0.00014	3		0.0238095	no
AAGAGTACT	17	0.17	0.00189	29		0	no
AAGATATAA	49	0.1	0.0002	3		0.0285714	no
AAGATATTG	34	0.11	0.00473	2		0	no
AAGATGCTG	8	0.43	5e-05	19		0.0714286	no
AAGATGGT	59	0.07	0.01646	3		0.0133333	no
AAGATTTGC	13	0.18	0.00291	34		0	no
AAGCAAAACA	15	0.05	0.31561	3		0	no
AAGCAACATCA	5	0.8	1e-05	1		0	no
AAGCAACGTA	7	0.48	2e-05	39		0	no
AAGCAATTAA	10	0.18	0.01325	33	YHP1	0	no
AAGCAGACC	15	0.24	4e-05	1		0	no
AAGCAGACCCC	6	0.67	<E-05	39		0	no
AAGCAGATAAT	5	1	<E-05	33	DAL80	0	no
AAGCATGC	27	0.1	0.0039	3		0.0588235	no
AAGCCACG	24	0.1	0.0099	39		0.233333	no
AAGCCAG	142	0.08	0.00366	3		0.101124	no
AAGCCAGC	39	0.08	0.00842	3		0.0943396	no
AAGCCCAC	18	0.21	0.0001	40		0.0512821	no
AAGCCCAG	22	0.08	0.04314	3		0.0909091	no
AAGCCCC	52	0.07	0.01652	3		0.130952	no
AAGCCCCA	16	0.09	0.0541	3		0.142857	no
AAGCCGC	88	0.07	0.01652	3	DAL81	0.184932	no
AAGCCTCTCT	11	0.18	0.01512	17		0.1	no
AAGCGAGAT	12	0.32	4e-05	34		0	no
AAGCGAGATC	6	0.93	<E-05	34		0	no
AAGCGAGATCT	5	1	<E-05	34		0	no
AAGCGATG	45	0.17	<E-05	16		0.219512	no
AAGCGGA	58	0.1	0.00038	26		0.0820513	no
AAGCGGAT	21	0.14	0.00075	3		0.0384615	no
AAGCGTGGC	9	0.25	0.00366	7		0	no
AAGCTAGGG	6	0.6	3e-05	14		0	no
AAGCTAT	229	0.06	0.06893	3		0.0416667	no
AAGCTATA	71	0.07	0.01646	3		0.0535714	no
AAGCTATT	89	0.07	0.01646	3		0.0495868	no
AAGCTATTTA	13	0.18	0.00127	3		0.0714286	no
AAGCTCA	93	0.1	0.00038	26		0.107744	no
AAGCTCAC	25	0.11	0.00312	3		0.0540541	no
AAGCTCAT	86	0.2	<E-05	16		0.150442	no
AAGCTCATCT	16	0.35	<E-05	15		0.615385	yes
AAGCTCATCTC	14	0.4	<E-05	15		0.615385	yes
AAGCTCATT	13	0.19	0.0028	16		0	no
AAGCTCCC	28	0.12	0.00068	3		0.0909091	no
AAGCTCCCAA	7	0.62	<E-05	33		0	no
AAGCTGAAAAA	22	0.19	0.00058	5		0.0625	no
AAGCTTCGTT	7	0.43	9e-05	1		0	no
AAGGACAA	38	0.11	0.00048	26		0.056338	no
AAGGAGC	143	0.07	0.01652	3		0.0930233	no
AAGGAGCA	53	0.09	0.00116	39		0.0897436	no
AAGGAGCG	30	0.12	0.0004	3		0.037037	no
AAGGAGTGCTG	6	0.67	<E-05	39	ADR1	0	no
AAGGATATA	32	0.13	0.00013	3		0.0465116	no
AAGGCCC	35	0.07	0.07258	26		0.0967742	no
AAGGCCCG	21	0.11	0.00545	3		0.04	no
AAGGCCTCC	7	0.48	4e-05	8		0	no
AAGGCGAT	36	0.06	0.11428	3		0.0754717	no
AAGGCGCA	21	0.11	0.02827	23		0.0645161	no
AAGGCGG	76	0.07	0.01652	3	STP1	0.0413223	no
AAGGCGGA	16	0.19	6e-05	20		0.0769231	no
AAGGCGGC	23	0.1	0.0082	3	STP1	0	no
AAGGCTGA	36	0.08	0.01162	3	SWI5	0.0754717	no
AAGGGAAGGAC	6	0.87	<E-05	13		1	yes
AAGGGAAT	66	0.09	0.0007	3		0.0679612	no
AAGGGAATT	17	0.19	0.00016	3		0.125	no
AAGGGAG	193	0.09	0.00067	3		0.145455	no
AAGGGAGA	72	0.08	0.00382	3		0.107527	no
AAGGGAGC	46	0.13	<E-05	3		0.183673	no
AAGGGAGG	41	0.07	0.02664	3	ADR1	0.1	no
AAGGGAGGA	10	0.24	0.00113	3	ADR1	0.176471	no
AAGGGAGT	41	0.1	0.00056	3	ADR1	0.0441176	no
AAGGGATAT	44	0.13	0.00013	6		0.0227273	no
AAGGGCCAC	13	0.15	0.01256	8		0.111111	no
AAGGGCCCT	18	0.16	0.00066	39		0.0769231	no
AAGGGCGG	23	0.15	0.00026	1		0.142857	no
AAGGGGAAGG	8	0.39	0.00062	23	MSN4	0.222222	no
AAGGGGATA	19	0.17	0.00017	3	MSN4	0	no
AAGGGGATT	10	0.29	0.00018	1	MSN4	0.153846	no
AAGGGGC	159	0.11	2e-05	3	MSN2	0.254464	yes
AAGGGGCA	46	0.11	8e-05	3	MSN4	0.172414	no
AAGGGGCC	36	0.13	<E-05	20	MSN4	0.38	yes
AAGGGGCCA	11	0.38	1e-05	19	MSN4	0.333333	yes
AAGGGGCG	49	0.13	0.00016	17	MSN2	0.215385	no
AAGGGGCGC	12	0.23	8e-05	20	MSN4	0.166667	no
AAGGGGCT	30	0.1	0.00307	3	MSN4	0.27027	yes
AAGGGGG	107	0.13	<E-05	3	ADR1	0.120567	no
AAGGGGGA	37	0.12	0.00012	3	ADR1	0.0434783	no
AAGGGGGC	28	0.25	<E-05	23	ADR1	0.0322581	no
AAGGGGGT	20	0.24	<E-05	3	ADR1	0.0833333	no
AAGGGGGTGG	8	0.46	0.00016	23	ADR1	0	no
AAGGGGGTT	6	0.47	0.00012	3	ADR1	0	no
AAGGGGTGA	11	0.42	<E-05	19	ADR1	0.111111	no
AAGGGGTT	47	0.18	<E-05	23	ADR1	0.186441	no
AAGGGGTTC	9	0.31	0.00017	3	ADR1	0.0769231	no
AAGGGTCT	49	0.1	0.00022	39		0.163636	no
AAGGGTCTG	7	0.67	<E-05	31		0.181818	no
AAGGGTCTGA	5	1	<E-05	13		0	no
AAGGGTGA	42	0.11	0.0002	1		0.192982	no
AAGGGTGAG	10	0.47	<E-05	13		0.307692	yes
AAGGGTT	222	0.08	0.00366	3	THI2	0.108359	no
AAGGGTTT	106	0.08	0.00382	3	THI2	0.0588235	no
AAGGTATATAA	15	0.22	0.00097	33	MOT3	0	no
AAGGTCCT	30	0.12	0.00048	39		0.0294118	no
AAGGTCTAGG	6	0.67	<E-05	39		0	no
AAGGTCTAGGC	6	0.67	<E-05	39		0	no
AAGGTGATTG	6	0.4	0.00161	21		0	no
AAGGTGGC	23	0.11	0.00472	25		0.1875	no
AAGTAAACA	34	0.09	0.01841	40	FKH2	0.0327869	no
AAGTACCT	46	0.08	0.00508	3		0.05	no
AAGTACTAA	45	0.13	4e-05	7		0.128205	no
AAGTATCAGT	9	0.39	<E-05	39		0	no
AAGTATCAGTA	6	0.67	<E-05	39		0	no
AAGTATGTGA	5	1	<E-05	16		0.5	yes
AAGTCATC	55	0.08	0.01943	16		0.0860215	no
AAGTCATCG	28	0.15	0.00116	23		0.172414	no
AAGTCCA	99	0.08	0.00366	3		0.0300752	no
AAGTCCCC	17	0.29	<E-05	27		0	no
AAGTCCGA	25	0.08	0.10966	29		0.175	no
AAGTCTCC	24	0.14	0.00771	13		0	no
AAGTCTGC	30	0.07	0.05365	3		0	no
AAGTCTTA	31	0.06	0.13874	3		0	no
AAGTGCGC	13	0.17	0.00169	25		0.0666667	no
AAGTGGG	118	0.07	0.01652	3	MET4	0.04375	no
AAGTGGGA	51	0.07	0.01646	3		0.0576923	no
AAGTGGGCA	14	0.19	0.00058	3		0	no
AAGTGGTTG	7	0.57	4e-05	28		0.181818	no
AAGTGTCC	33	0.1	0.00202	3		0	no
AAGTTAAATT	15	0.28	2e-05	34		0	no
AAGTTAAATTG	6	0.67	<E-05	29		0	no
AAGTTAATTT	13	0.29	0.00013	27		0	no
AAGTTAGA	66	0.08	0.00382	3		0.0111111	no
AAGTTATA	117	0.08	0.00382	3		0.0804598	no
AAGTTATTG	40	0.16	1e-05	2		0.0930233	no
AAGTTCCG	25	0.08	0.03782	3		0.25	yes
AAGTTCG	121	0.06	0.06893	3		0.0338983	no
AAGTTGATAT	10	0.22	0.00399	40		0.0555556	no
AAGTTGCAAA	6	0.67	3e-05	18		0	no
AAGTTTGT	70	0.06	0.06862	3		0.0247934	no
AATAAAACAA	34	0.11	0.01908	32		0	no
AATAAACATT	15	0.25	4e-05	39		0.111111	no
AATAAGACAAA	7	0.67	1e-05	5		0.166667	no
AATAAGGGG	31	0.15	2e-05	3		0.37037	yes
AATAAGTGCA	15	0.28	1e-05	8		0	no
AATAATTACT	20	0.07	0.19217	27		0.136364	no
AATAATTCGTA	5	0.8	1e-05	1		0	no
AATACGCCAA	6	0.53	0.00025	7		0	no
AATACTCA	71	0.08	0.00382	3		0.00980392	no
AATAGAATTT	20	0.26	<E-05	10		0	no
AATAGAC	205	0.06	0.06893	3		0.0819113	no
AATAGACA	83	0.06	0.06862	3		0.0373832	no
AATAGACATA	5	0.7	2e-05	1		0	no
AATAGCGAGC	6	0.87	<E-05	34		1	yes
AATAGCGGCC	6	0.87	<E-05	8		0	no
AATAGGAGT	10	0.29	0.00018	1	ADR1	0.0555556	no
AATAGGG	175	0.07	0.01652	3		0.116364	no
AATAGGGT	53	0.08	0.00382	3		0.0853659	no
AATAGGGTT	12	0.3	3e-05	3		0	no
AATAGTGTT	28	0.14	0.00014	1		0.0967742	no
AATATAAGC	31	0.1	0.00241	3		0	no
AATATACGAAT	7	0.57	1e-05	1		0	no
AATATATGTTC	7	0.52	2e-05	39		0	no
AATATCCC	49	0.08	0.00327	3		0.015873	no
AATATGTC	44	0.12	0.00026	16		0.0117647	no
AATATGTCA	18	0.22	0.00015	28		0	no
AATATTACTTA	6	0.53	7e-05	39		0	no
AATATTCTTGT	5	0.8	1e-05	1		0	no
AATATTGTTCA	9	0.5	<E-05	1		0	no
AATCAAGT	73	0.07	0.01646	3		0.06	no
AATCACAGCC	6	0.87	<E-05	2		0	no
AATCACCTGG	8	0.43	1e-05	1		0	no
AATCACCTGGA	6	0.53	7e-05	39		0	no
AATCAGATG	13	0.17	0.00204	3		0	no
AATCAGCA	65	0.09	0.0007	3	SWI5	0.0235294	no
AATCAGCT	49	0.09	0.00133	39		0.0172414	no
AATCAGGCGT	6	0.67	<E-05	39		0	no
AATCAGGCGTC	6	0.67	<E-05	39		0	no
AATCAGTGC	8	0.39	8e-05	1		0.0714286	no
AATCAGTGCA	6	0.67	<E-05	39		0.166667	no
AATCAGTGCAA	6	0.67	<E-05	39		0.2	no
AATCCAGG	20	0.21	<E-05	1		0.12	no
AATCCCAA	36	0.07	0.09055	16		0.015873	no
AATCCCG	68	0.11	2e-05	3	DAL81	0.141304	no
AATCCCGC	14	0.12	0.01792	3	DAL81	0.409091	yes
AATCCCT	134	0.08	0.00366	3		0.1	no
AATCCCTT	68	0.09	0.0007	3		0.104651	no
AATCCGGA	19	0.09	0.0297	3		0.178571	no
AATCCGTA	51	0.13	5e-05	29		0.115385	no
AATCCGTACA	12	0.36	<E-05	10		0.4	yes
AATCCGTACAT	7	0.62	<E-05	11		0.5	yes
AATCCTGC	20	0.18	0.00047	28		0.0196078	no
AATCGATG	42	0.17	<E-05	16		0.126761	no
AATCGCGAC	11	0.11	0.05035	7		0.181818	no
AATCTAAG	53	0.07	0.01646	3		0.03125	no
AATCTACG	40	0.12	0.00044	6		0.119048	no
AATCTATAG	27	0.18	<E-05	1		0.0434783	no
AATCTCATCTC	6	0.8	<E-05	10		0.25	yes
AATCTCCG	19	0.08	0.1106	16		0.153846	no
AATCTCTA	61	0.09	0.0007	3		0.0227273	no
AATCTGGA	48	0.08	0.0037	3		0.0285714	no
AATGAAGGAG	7	0.67	<E-05	27		0.166667	no
AATGACAAAA	32	0.16	3e-05	7		0.0344828	no
AATGACATA	8	0.25	0.00215	20		0.0666667	no
AATGACCCA	8	0.54	1e-05	17		0.25	yes
AATGACGC	27	0.11	0.00189	3		0.136364	no
AATGACTAAT	11	0.45	<E-05	27		0.333333	yes
AATGAGAT	54	0.1	0.00012	25		0.0423729	no
AATGAGATG	27	0.18	3e-05	16		0.027027	no
AATGAGATGAG	8	0.54	<E-05	16		0.666667	yes
AATGATTATTT	7	0.48	2e-05	1		0.142857	no
AATGCATACA	6	0.67	<E-05	1		0.222222	no
AATGCATACAC	6	0.67	<E-05	39		0.2	no
AATGCGAT	71	0.14	<E-05	19		0.164179	no
AATGCGATG	36	0.25	<E-05	15		0.28	yes
AATGCGATGA	24	0.27	<E-05	15		0.454545	yes
AATGCGATGAG	20	0.26	<E-05	19		0.5	yes
AATGCTGACC	6	0.67	<E-05	39	SWI5	0.142857	no
AATGCTGACCA	6	0.67	<E-05	39	SWI5	0.166667	no
AATGCTGC	40	0.09	0.00224	3		0	no
AATGCTGG	31	0.09	0.00686	3	SWI5	0.0638298	no
AATGCTTG	58	0.07	0.01646	3		0.0526316	no
AATGGAACATA	7	0.48	2e-05	39		0	no
AATGGCCG	21	0.16	0.00024	39		0	no
AATGGCCGA	8	0.43	2e-05	39		0	no
AATGGCTGG	10	0.24	0.00108	39	SWI5	0.3	yes
AATGGGA	67	0.09	0.00204	26		0.0188679	no
AATGGGCTTTT	5	0.5	0.0009	1		0.25	yes
AATGGTAAC	18	0.22	0.0003	27		0	no
AATGGTACA	9	0.14	0.02973	16		0.105263	no
AATGGTCA	40	0.09	0.00224	3		0.0153846	no
AATGGTGCTG	6	0.53	7e-05	39		0	no
AATGGTGCTGT	6	0.53	7e-05	39		0	no
AATGGTTT	66	0.07	0.01646	3		0.0515464	no
AATGTAAACTC	7	0.48	2e-05	39		0	no
AATGTACCC	13	0.28	0.00014	8		0	no
AATGTACG	53	0.16	<E-05	10		0.1	no
AATGTACGG	22	0.42	<E-05	1		0.117647	no
AATGTACGGA	16	0.42	<E-05	1		0.136364	no
AATGTACGGAT	12	0.48	<E-05	1		0.214286	no
AATGTATAG	28	0.18	0.00013	33		0.0869565	no
AATGTATCAG	5	1	<E-05	33		0	no
AATGTATG	57	0.12	0.00016	28		0.0442478	no
AATGTATGG	23	0.27	<E-05	10		0.0357143	no
AATGTATGGAT	9	0.75	<E-05	15		0.333333	yes
AATGTATGGG	11	0.36	<E-05	1		0.0833333	no
AATGTATGGGT	10	0.58	<E-05	10		0.125	no
AATGTGCT	57	0.07	0.01646	3		0.0240964	no
AATGTTAG	39	0.08	0.03658	40		0	no
AATGTTGGCT	11	0.35	5e-05	34		0	no
AATTAAAGCTG	5	1	<E-05	13		NA	yes
AATTAATA	156	0.07	0.01646	3		0.0318725	no
AATTAATAT	54	0.1	0.00014	3		0.0123457	no
AATTACATT	21	0.19	2e-05	25		0.111111	no
AATTACCC	46	0.06	0.07502	3		0.246377	yes
AATTAGAA	141	0.06	0.06862	3		0.0206186	no
AATTAGAAA	60	0.07	0.01646	3		0.0136986	no
AATTAGAT	79	0.07	0.01646	3		0.0204082	no
AATTAGCC	39	0.08	0.00842	3		0.0677966	no
AATTAGCTGT	8	0.36	9e-05	39		0	no
AATTAGGT	21	0.12	0.00501	26		0.0487805	no
AATTAGTAA	41	0.08	0.02963	24	ARR1	0.135135	no
AATTATATCCG	6	0.67	<E-05	39		0	no
AATTATGCG	10	0.29	0.00029	3		0	no
AATTATTCAAC	7	0.57	1e-05	39		0	no
AATTATTTAAA	14	0.21	0.00029	3		0.285714	yes
AATTCCAC	28	0.17	6e-05	29		0.2	no
AATTCCCCT	18	0.26	6e-05	15		0	no
AATTCCTCGAG	7	0.48	2e-05	39		0	no
AATTCCTTC	26	0.18	2e-05	8		0	no
AATTCCTTG	13	0.14	0.01265	1		0.130435	no
AATTCGATA	24	0.2	4e-05	2		0	no
AATTCGCG	29	0.13	0.00094	40		0.340426	yes
AATTCTTACCC	6	0.6	7e-05	19		0	no
AATTCTTTC	37	0.1	0.00098	3		0.0181818	no
AATTGAGG	55	0.08	0.00382	3		0.0384615	no
AATTGGAAA	50	0.15	5e-05	18	HAP2	0.0181818	no
AATTGGAT	72	0.09	0.00116	39	HAP2	0.0786517	no
AATTGGATT	27	0.14	0.00013	39	HAP2	0.0277778	no
AATTGGATTT	11	0.38	<E-05	1	HAP2	0.0555556	no
AATTGGGA	48	0.08	0.0037	3	HAP2	0.0298507	no
AATTGGGT	20	0.23	<E-05	30	HAP2	0	no
AATTGTAAAT	7	0.57	3e-05	16		0.166667	no
AATTGTAGATG	6	0.67	<E-05	39		0.333333	yes
AATTGTCG	44	0.07	0.02154	3		0.0175439	no
AATTTAACG	21	0.18	4e-05	1		0.0606061	no
AATTTAGA	50	0.11	0.00071	28		0.00847458	no
AATTTAGGATC	6	0.67	<E-05	39		0	no
AATTTCATC	54	0.17	<E-05	19		0.0806452	no
AATTTGGAA	42	0.16	4e-05	18		0	no
AATTTGTTTAA	5	1	<E-05	14		NA	yes
AATTTTCA	151	0.13	<E-05	26		0.153132	no
AATTTTCAGT	24	0.35	<E-05	18		0.222222	no
AATTTTCAT	37	0.17	<E-05	26		0.137931	no
AATTTTCTAT	34	0.19	3e-05	15		0.0967742	no
AATTTTGAAA	50	0.15	2e-05	10		0.130435	no
AATTTTGCGA	8	0.54	<E-05	16		0.307692	yes
AATTTTGCGAT	7	0.76	<E-05	15		0.222222	no
AATTTTTCA	266	0.19	<E-05	16		0.317308	yes
AATTTTTCAA	78	0.26	<E-05	16		0.438596	yes
AATTTTTCAAT	39	0.17	1e-05	7		0.285714	yes
AATTTTTCAC	95	0.16	<E-05	10		0.573034	yes
AATTTTTCACT	53	0.18	<E-05	10		0.578947	yes
AATTTTTCAG	55	0.22	<E-05	16		0.507246	yes
AATTTTTCAGT	16	0.38	<E-05	16		0.266667	yes
AATTTTTCAT	85	0.18	<E-05	16		0.413793	yes
AATTTTTCATC	28	0.2	<E-05	24		0.4	yes
AATTTTTCATT	72	0.18	<E-05	15		0.338235	yes
AATTTTTCG	33	0.15	0.00014	28		0.1	no
AATTTTTCTTG	13	0.37	<E-05	10		0.0625	no
AATTTTTTC	78	0.11	7e-05	37		0.0769231	no
AATTTTTTCT	27	0.2	1e-05	37		0.0757576	no
AATTTTTTTCA	31	0.21	<E-05	40		0.151515	no
ACAAAAAAAAC	20	0.29	<E-05	2		0	no
ACAAAAAATAG	8	0.29	0.0006	3		0	no
ACAAAAATTT	9	0.33	9e-05	25		0.0454545	no
ACAAAACATAT	6	0.53	7e-05	39		0	no
ACAAAACCTTC	6	0.67	<E-05	39		0	no
ACAAAATAGT	14	0.18	0.00083	3		0	no
ACAAAGAAATA	11	0.11	0.05996	19		0	no
ACAAAGCGC	8	0.5	1e-05	2		0	no
ACAAATCC	38	0.12	0.00089	19		0.0204082	no
ACAACAATG	26	0.12	0.00102	3		0.0606061	no
ACAACATA	50	0.1	1e-05	20		0.0377358	no
ACAACATAAG	9	0.42	<E-05	4		0	no
ACAACCTC	35	0.1	0.00134	3		0	no
ACAACGCG	29	0.12	0.00057	1		0.193548	no
ACAACGGCC	5	0.7	8e-05	3		0.111111	no
ACAACTGTA	23	0.28	<E-05	23		0	no
ACAACTGTAA	8	0.75	<E-05	23		0.111111	no
ACAAGACT	40	0.08	0.00817	3		0	no
ACAAGCAT	62	0.07	0.01646	3		0.0714286	no
ACAAGCGG	35	0.11	0.00067	39		0.0571429	no
ACAAGCTC	11	0.24	0.0006	26		0.108108	no
ACAATATTCT	15	0.24	4e-05	1		0	no
ACAATCCCA	9	0.36	4e-05	39		0	no
ACAATCCTGA	6	0.67	<E-05	8		0	no
ACAATCTC	37	0.11	0.00024	3		0	no
ACAATGTT	67	0.07	0.01646	3		0.0235294	no
ACAATTCATC	5	0.7	2e-05	39		0.125	no
ACAATTTCCG	5	0.8	1e-05	1		0.166667	no
ACAATTTCCGA	5	0.8	1e-05	1		0.2	no
ACACAAAAAC	16	0.37	<E-05	2		0.235294	no
ACACAAAAG	30	0.22	1e-05	2		0.219512	no
ACACCAAAC	13	0.09	0.05354	3		0	no
ACACCCAA	34	0.14	0.00013	40		0.109091	no
ACACCCAAA	27	0.15	0.00039	8		0.05	no
ACACCCAAAC	8	0.71	<E-05	17		0.416667	yes
ACACCCAAACA	7	0.71	<E-05	17		0.4	yes
ACACCCATA	19	0.27	1e-05	12		0.133333	no
ACACCGT	25	0.06	0.23879	26		0.046729	no
ACACCTGGA	8	0.36	9e-05	39		0	no
ACACCTGTA	16	0.28	1e-05	10		0	no
ACACCTGTAC	9	0.44	3e-05	10		0.181818	no
ACACCTTCGT	7	0.48	2e-05	39		0	no
ACACCTTCGTT	6	0.67	<E-05	39		0	no
ACACGATAG	15	0.18	0.002	8		0	no
ACACGCA	67	0.06	0.07804	20		0.0441176	no
ACACTATG	22	0.16	0.00013	1		0.0487805	no
ACACTCGGA	5	0.8	1e-05	1		0	no
ACACTCGGAC	6	0.67	<E-05	39		0	no
ACACTCGGACA	6	0.67	<E-05	39		0	no
ACACTTGCT	20	0.09	0.07323	15		0	no
ACAGATTG	41	0.08	0.00735	3		0.0204082	no
ACAGCAAAC	33	0.12	0.0002	39		0.0294118	no
ACAGCAGA	53	0.07	0.01646	3		0.0625	no
ACAGCCCC	8	0.29	0.0006	3		0.0833333	no
ACAGGAAT	51	0.09	0.00116	39		0	no
ACAGGATA	39	0.07	0.03179	3		0.115385	no
ACAGGATT	39	0.07	0.03179	3		0.0416667	no
ACAGGGCG	9	0.25	0.00142	25		0.0833333	no
ACAGGGTA	31	0.13	7e-05	3		0.116279	no
ACAGGGTT	20	0.07	0.09364	3		0.107143	no
ACAGGTGA	31	0.06	0.13874	3		0.0487805	no
ACAGTAGTAGG	5	1	<E-05	16		0	no
ACAGTCGG	6	0.13	0.13683	3		0	no
ACAGTGAG	27	0.13	0.00032	1		0.0540541	no
ACAGTGAT	24	0.13	0.00129	37		0.0144928	no
ACAGTGGT	23	0.1	0.00377	20		0	no
ACAGTGTT	55	0.07	0.01646	3		0.0140845	no
ACAGTTA	199	0.08	0.00366	3		0.0301003	no
ACAGTTAA	63	0.08	0.00382	3		0.0106383	no
ACAGTTAT	64	0.08	0.00382	3		0.021978	no
ACAGTTGCT	20	0.11	0.03735	33		0	no
ACATAAAGG	14	0.19	0.00194	29		0.0625	no
ACATAACCAT	8	0.36	9e-05	39		0.2	no
ACATAACCATT	6	0.67	<E-05	39		0.333333	yes
ACATAACG	39	0.07	0.03179	3		0.0166667	no
ACATACAGC	11	0.45	<E-05	39		0	no
ACATACAGCA	8	0.61	<E-05	1		0	no
ACATAGATG	13	0.1	0.05354	3		0	no
ACATAGG	85	0.07	0.01652	3		0.008	no
ACATAGTG	27	0.14	0.00014	3		0	no
ACATATATT	36	0.11	0.00024	25		0.0273973	no
ACATATCATC	10	0.42	1e-05	7		0	no
ACATATGG	42	0.06	0.08939	3		0.0392157	no
ACATCAATCTC	5	0.8	1e-05	1		NA	yes
ACATCAGA	18	0.14	0.00268	37		0.0222222	no
ACATCAGT	39	0.09	0.00281	3		0.0188679	no
ACATCATA	75	0.1	0.00014	3		0.0102041	no
ACATCCGTA	23	0.3	<E-05	10		0.0882353	no
ACATCCGTAC	17	0.33	<E-05	10		0.24	no
ACATCCGTACA	12	0.44	<E-05	1		0.3	yes
ACATCTGTAC	6	0.67	<E-05	16		0.375	yes
ACATCTGTACA	6	0.67	<E-05	16		0.428571	yes
ACATGAAAAA	32	0.19	1e-05	15		0.0769231	no
ACATGATG	30	0.05	0.30625	3		0.0952381	no
ACATGATT	64	0.1	0.00028	1		0.0306122	no
ACATGCAA	53	0.06	0.06862	3		0.0465116	no
ACATGCTA	42	0.09	0.00177	3		0.0701754	no
ACATGGTA	42	0.08	0.00682	3		0.0833333	no
ACATGTCT	21	0.1	0.01445	3		0.030303	no
ACATGTTACA	5	0.8	1e-05	39		0	no
ACATGTTG	20	0.07	0.09364	3		0.121951	no
ACATTGTC	51	0.08	0.00382	3		0.0847458	no
ACATTGTTGT	12	0.33	7e-05	17		0.125	no
ACATTTAGG	10	0.33	9e-05	1		0.0833333	no
ACCAACAT	48	0.07	0.019	3		0.016129	no
ACCAACTTT	20	0.15	0.00069	14		0	no
ACCAAGAGG	14	0.36	<E-05	14		0.111111	no
ACCAAGAGGC	7	0.48	2e-05	34		0.5	yes
ACCAAGAGGCC	5	0.9	<E-05	14		1	yes
ACCAAGTGT	7	0.67	<E-05	31		0	no
ACCAAGTGTT	5	0.9	1e-05	31		0	no
ACCAAGTTC	15	0.29	5e-05	15		0.181818	no
ACCAAGTTT	12	0.21	0.00211	11		0.0357143	no
ACCAATCA	54	0.1	0.00028	1	HAP2	0.25	yes
ACCAATCAA	13	0.28	5e-05	1	HAP2	0.1	no
ACCAATCG	17	0.12	0.02987	23	HAP2	0.0526316	no
ACCAATGT	26	0.14	1e-05	20	HAP2	0	no
ACCACAACAAC	6	0.53	7e-05	39		NA	yes
ACCACAATA	24	0.22	3e-05	2		0.08	no
ACCACCA	44	0.1	0.00111	26		0.0628931	no
ACCACGCC	10	0.31	0.00083	23		0.142857	no
ACCACGTC	18	0.14	0.00211	39		0.105263	no
ACCAGATT	49	0.14	5e-05	23		0.0204082	no
ACCAGCGT	23	0.15	0.00043	39		0.0294118	no
ACCAGGG	34	0.09	0.00599	25		0.057971	no
ACCAGTCT	26	0.1	0.00524	3		0	no
ACCAGTCTT	11	0.24	0.0004	3		0	no
ACCATACA	49	0.08	0.01815	24		0	no
ACCATAGT	44	0.13	0.0001	10		0.0204082	no
ACCATCAG	14	0.22	8e-05	25		0.04	no
ACCATCCA	25	0.1	0.00734	3		0.0882353	no
ACCATTCA	37	0.08	0.01083	3		0.0289855	no
ACCATTTCTC	8	0.36	9e-05	39		0.375	yes
ACCATTTCTCC	7	0.48	2e-05	39		0.75	yes
ACCCAAAC	51	0.14	<E-05	29		0.202899	no
ACCCAAACA	44	0.14	<E-05	19		0.255814	yes
ACCCAAACAT	14	0.38	<E-05	12		0.44	yes
ACCCAAACATT	9	0.69	<E-05	23		0.5	yes
ACCCAATA	39	0.06	0.09731	3	HAP2	0.116667	no
ACCCAATTCC	7	0.48	2e-05	34	HAP2	0	no
ACCCACACA	26	0.21	3e-05	18		0.222222	no
ACCCACACAT	11	0.42	2e-05	18		0.444444	yes
ACCCAGACA	20	0.24	<E-05	10		0.190476	no
ACCCATAC	43	0.22	<E-05	12	RAP1	0.164835	no
ACCCATACATA	5	1	1e-05	7		0.333333	yes
ACCCATGC	27	0.21	1e-05	35		0.15625	no
ACCCATGCA	14	0.4	<E-05	16		0.130435	no
ACCCCAA	84	0.07	0.01652	3	ADR1	0.15493	no
ACCCCATTAT	7	0.48	2e-05	39	ADR1	0	no
ACCCCATTATT	6	0.67	<E-05	39	ADR1	0	no
ACCCCCG	23	0.12	0.00191	3	ADR1	0.08	no
ACCCCCTA	19	0.12	0.00463	3	ADR1	0	no
ACCCCGCC	13	0.38	<E-05	3	ADR1	0.2	no
ACCCCGCT	10	0.27	0.00046	3	ADR1	0	no
ACCCCGG	35	0.1	0.00127	3	ADR1	0.297872	yes
ACCCCGTC	9	0.42	<E-05	31	ADR1	0	no
ACCCCGTG	10	0.27	0.0003	1	ADR1	0.181818	no
ACCCCTAT	26	0.27	<E-05	3	ADR1	0.185185	no
ACCCCTATA	10	0.36	8e-05	16	ADR1	0.222222	no
ACCCCTC	35	0.14	4e-05	26	ADR1	0.169811	no
ACCCCTG	38	0.13	1e-05	39	ADR1	0.169811	no
ACCCCTT	131	0.14	<E-05	3	ADR1	0.172414	no
ACCCCTTA	43	0.13	<E-05	1	ADR1	0.155556	no
ACCCCTTAA	15	0.33	2e-05	23	ADR1	0.0625	no
ACCCCTTAT	18	0.25	<E-05	3	ADR1	0.263158	yes
ACCCCTTT	50	0.13	<E-05	3	ADR1	0.0983607	no
ACCCCTTTTT	7	0.52	9e-05	33	ADR1	0.2	no
ACCCGACG	10	0.18	0.00436	39		0.1	no
ACCCGCCC	37	0.15	1e-05	8		0.333333	yes
ACCCGCG	39	0.08	0.00832	3		0.291667	yes
ACCCGCGC	16	0.05	0.41399	3		0.44	yes
ACCCGGAA	39	0.09	0.00281	3		0.255319	yes
ACCCGGC	100	0.08	0.00366	3	YDR026c	0.272109	yes
ACCCGGCT	33	0.11	0.00068	39		0.097561	no
ACCCGGT	61	0.09	0.00119	39		0.141414	no
ACCCGTACA	10	0.38	<E-05	1	FHL1	0.0714286	no
ACCCGTACAT	6	0.67	<E-05	16	FHL1	0.111111	no
ACCCTGT	46	0.11	7e-05	37		0.0977444	no
ACCCTGTC	15	0.16	0.00191	3		0	no
ACCCTTCG	19	0.14	0.00192	1		0.0967742	no
ACCCTTCT	56	0.07	0.01646	3		0.0952381	no
ACCCTTGG	22	0.14	0.00057	3		0.0833333	no
ACCCTTTTT	74	0.08	0.00382	3		0.130952	no
ACCCTTTTTT	41	0.07	0.08542	24		0.232558	no
ACCGAAAT	31	0.12	0.00033	3		0.0566038	no
ACCGAAATT	11	0.29	0.00013	3		0	no
ACCGAAGC	12	0.21	0.00273	29		0.0625	no
ACCGACG	44	0.1	0.00038	3		0.0441176	no
ACCGAGC	41	0.09	0.00211	3		0.0769231	no
ACCGAGCC	9	0.11	0.09454	3		0.0666667	no
ACCGAGCCA	4	0.67	0.00017	39		0	no
ACCGAGGT	9	0.28	0.00111	29		0	no
ACCGATGC	18	0.22	0.00037	23		0.0526316	no
ACCGATTTA	6	0.53	0.00029	16		0	no
ACCGCAAC	30	0.09	0.00765	3		0.09375	no
ACCGCACG	8	0.25	0.00315	3	PHO2	0.1	no
ACCGCACT	20	0.1	0.01633	3		0.0333333	no
ACCGCAGC	25	0.06	0.17708	3		0.121212	no
ACCGCAGT	20	0.08	0.09631	40		0	no
ACCGCCAC	9	0.06	0.21618	3		0.0555556	no
ACCGCTC	63	0.07	0.01652	3		0.0515464	no
ACCGGAA	96	0.07	0.01652	3		0.109489	no
ACCGGAAA	50	0.07	0.01646	3		0.0461538	no
ACCGGAG	42	0.09	0.00182	3		0.0864198	no
ACCGGAGA	17	0.1	0.02336	3		0.1	no
ACCGGTAAG	6	0.67	<E-05	5		0	no
ACCGTCCTA	6	0.67	<E-05	17		0	no
ACCGTGG	46	0.06	0.07413	3		0.0705882	no
ACCTACATG	11	0.29	0.00014	1		0	no
ACCTACATGA	10	0.27	0.00147	33		0	no
ACCTACATGAT	6	0.67	<E-05	39		0	no
ACCTATCA	32	0.07	0.04941	3		0.0192308	no
ACCTCAG	77	0.07	0.01652	3		0.0176991	no
ACCTCAT	120	0.13	5e-05	16		0.118143	no
ACCTCATC	65	0.27	<E-05	16		0.257732	yes
ACCTCATCT	27	0.22	<E-05	16		0.114286	no
ACCTCCAGG	6	0.53	7e-05	39	ADR1	0	no
ACCTCCAGGT	6	0.53	7e-05	39	ADR1	0	no
ACCTCCGT	17	0.24	2e-05	3	ADR1	0	no
ACCTCCT	92	0.08	0.00366	3	ADR1	0.0367647	no
ACCTCCTAC	4	0.83	0.0002	3	ADR1	0.25	yes
ACCTCGC	47	0.07	0.12112	31		0.0365854	no
ACCTCGG	34	0.15	<E-05	3	UGA3	0.0769231	no
ACCTCGGA	18	0.17	0.00218	17		0	no
ACCTCGGC	10	0.09	0.07396	3		0.142857	no
ACCTCGTAT	12	0.39	<E-05	1		0	no
ACCTCGTATTA	5	0.8	1e-05	1		NA	yes
ACCTCTATTA	6	0.67	1e-05	13		0	no
ACCTGACT	10	0.2	0.00976	28	ASH1	0	no
ACCTGCTA	27	0.08	0.02402	3		0.025641	no
ACCTGGAG	19	0.2	3e-05	1		0.133333	no
ACCTGGAGT	9	0.33	0.0002	1	ADR1	0.166667	no
ACCTGGAGTT	8	0.43	1e-05	1	ADR1	0	no
ACCTGGCC	15	0.1	0.0314	3		0.0714286	no
ACCTGTAC	30	0.15	0.00023	10		0.047619	no
ACCTGTGC	19	0.06	0.17881	3		0	no
ACCTTCGTTC	7	0.48	2e-05	39		0	no
ACCTTCGTTCA	6	0.67	<E-05	39		0	no
ACCTTCTT	88	0.06	0.06862	3		0.00854701	no
ACCTTGAA	53	0.08	0.00382	3		0.0111111	no
ACCTTTTG	82	0.06	0.06862	3		0.0103093	no
ACGAAAATTTT	21	0.25	1e-05	35		0.458333	yes
ACGAAACT	52	0.07	0.01646	3		0.0416667	no
ACGAACCA	22	0.13	0.00108	3		0.147059	no
ACGAACTT	38	0.06	0.09636	3		0	no
ACGAATGATC	5	0.8	1e-05	1		0	no
ACGAATGATCG	6	0.67	<E-05	39		0	no
ACGACAA	164	0.07	0.01652	3	SIG1	0.061674	no
ACGACAAAC	10	0.24	0.00065	21		0.0555556	no
ACGACAAG	36	0.12	0.00011	3		0.0833333	no
ACGACCAA	20	0.12	0.01158	40		0.0606061	no
ACGACCC	30	0.11	0.00156	39		0.0512821	no
ACGACCT	58	0.07	0.01652	3	ZAP1	0.027027	no
ACGACCTA	15	0.1	0.05673	24		0	no
ACGACGA	66	0.08	0.00366	3		0.0967742	no
ACGACTCC	13	0.12	0.01696	3		0	no
ACGAGAAA	93	0.06	0.06862	3		0.03125	no
ACGAGAAAG	12	0.09	0.14257	16		0	no
ACGAGAAG	47	0.09	0.00089	3		0.0357143	no
ACGAGACG	15	0.08	0.08295	3		0.111111	no
ACGAGAGA	24	0.09	0.01783	3		0	no
ACGAGATT	25	0.08	0.03782	3		0.0232558	no
ACGAGCAT	15	0.16	0.00191	3		0	no
ACGAGGATG	5	1	<E-05	13		0	no
ACGAGTTG	18	0.13	0.00376	3		0.1	no
ACGATAAC	43	0.15	2e-05	2	DAL80	0.0625	no
ACGATATT	66	0.06	0.06862	3		0.0446429	no
ACGATCCT	15	0.11	0.01905	3		0.133333	no
ACGATGCT	32	0.09	0.00647	3		0	no
ACGATTAT	54	0.06	0.06862	3		0.0481928	no
ACGATTGAA	8	0.32	0.00186	28		0	no
ACGCAAGA	47	0.06	0.07786	3		0.0277778	no
ACGCACAA	35	0.1	0.00192	39		0	no
ACGCACC	46	0.06	0.07413	3		0.107692	no
ACGCACG	25	0.1	0.01316	26		0.0909091	no
ACGCACTG	22	0.12	0.00271	3		0	no
ACGCAGCT	22	0.13	0.00117	39		0	no
ACGCCAA	64	0.1	0.00046	37		0.152542	no
ACGCCAAA	34	0.12	0.00024	37		0.259615	yes
ACGCCAAAAT	9	0.33	0.0002	1		0.461538	yes
ACGCCAGC	21	0.09	0.12952	18		0.12	no
ACGCCCTA	11	0.24	0.0004	3		0.047619	no
ACGCCCTG	12	0.23	0.00179	23		0	no
ACGCCGCC	12	0.18	0.00305	39		0.15	no
ACGCCGTT	29	0.08	0.02202	3		0.09375	no
ACGCGAAAAT	16	0.28	<E-05	39	SWI6	0.461538	yes
ACGCGAAG	27	0.08	0.03558	39		0.0263158	no
ACGCGACGC	22	0.47	<E-05	1		0.24	no
ACGCGACGCG	19	0.48	<E-05	1		0.75	yes
ACGCGACGCGA	5	1	<E-05	1		0.714286	yes
ACGCGAG	22	0.12	0.00481	37		0.0769231	no
ACGCGAGA	14	0.15	0.00895	40		0	no
ACGCGAGG	21	0.21	2e-05	34		0.0625	no
ACGCGCCAA	12	0.27	9e-05	39		0.0666667	no
ACGCGGGC	9	0.33	0.00014	20		0	no
ACGCGTAA	59	0.31	<E-05	1		0.253968	yes
ACGCGTAAA	19	0.59	<E-05	1		0.391304	yes
ACGCGTAAC	11	0.35	<E-05	1		0	no
ACGCGTAAT	23	0.19	2e-05	39		0	no
ACGCGTC	102	0.27	<E-05	1	MBP1	0.354839	yes
ACGCGTCC	8	0.71	<E-05	37	MBP1	0.0833333	no
ACGCGTCG	27	0.36	<E-05	1	MBP1	0.428571	yes
ACGCGTCGC	16	0.47	<E-05	1	MBP1	0.411765	yes
ACGCGTCGCG	16	0.47	<E-05	1	MBP1	0.6	yes
ACGCGTCGCGT	13	0.5	<E-05	1	MBP1	0.636364	yes
ACGCGTCT	28	0.17	<E-05	1	MBP1	0.228571	no
ACGCGTCTC	5	0.9	1e-05	37	MBP1	0.142857	no
ACGCGTCTT	11	0.27	0.00022	39	MBP1	0	no
ACGCGTCTTT	7	0.43	6e-05	39	MBP1	0.5	yes
ACGCGTTA	37	0.26	<E-05	1		0.22449	no
ACGCGTTAA	12	0.36	<E-05	1		0.181818	no
ACGCGTTAT	7	0.33	0.00201	40		0.214286	no
ACGCGTTCTG	6	0.73	<E-05	39		0.25	yes
ACGCGTTTA	17	0.28	1e-05	1		0	no
ACGCGTTTTT	16	0.47	<E-05	1		0.533333	yes
ACGCGTTTTTT	7	0.52	2e-05	1		0.285714	yes
ACGCTAA	123	0.06	0.06893	3		0.0523256	no
ACGCTCAT	26	0.1	0.00847	1		0.0294118	no
ACGCTCCT	18	0.17	0.00018	3		0.0322581	no
ACGCTCCTT	16	0.23	0.00017	35		0	no
ACGCTCG	15	0.15	0.00463	26		0.0357143	no
ACGCTGAG	15	0.17	0.00115	3		0.0454545	no
ACGCTTAC	19	0.09	0.0297	3		0.0344828	no
ACGCTTAG	21	0.2	9e-05	29		0.0333333	no
ACGCTTTAC	14	0.22	0.00012	39		0	no
ACGCTTTTCT	18	0.16	0.00153	8		0	no
ACGGAAG	113	0.08	0.00366	3		0.0346821	no
ACGGAAGA	61	0.09	0.0007	3	RGT1	0.0266667	no
ACGGACCC	11	0.07	0.23393	3		0.0833333	no
ACGGACG	32	0.1	0.00882	40		0.0645161	no
ACGGATCA	18	0.1	0.01816	3	RGT1	0.0869565	no
ACGGATG	45	0.14	5e-05	11		0.1625	no
ACGGATGT	32	0.18	1e-05	16		0.126984	no
ACGGCCC	35	0.09	0.00393	3	STP1	0.0923077	no
ACGGCCG	32	0.1	0.0021	3	STP1	0.118644	no
ACGGCTGT	35	0.09	0.00441	3	STP1	0.0666667	no
ACGGGAT	81	0.09	0.00067	3		0.036036	no
ACGGGATA	26	0.09	0.01162	3		0	no
ACGGGCCAA	9	0.31	0.0002	1		0.181818	no
ACGGGCCAAG	9	0.36	4e-05	39		0.125	no
ACGGGGGG	6	0.33	0.00392	3	ADR1	0	no
ACGGGGT	39	0.08	0.06746	23	ADR1	0.0769231	no
ACGGGGTT	13	0.21	0.00038	14	ADR1	0.047619	no
ACGGGGTTT	7	0.48	2e-05	14	ADR1	0	no
ACGGGTAAT	35	0.11	0.00203	8	REB1	0.241379	yes
ACGGTTAG	9	0.11	0.12186	16		0	no
ACGGTTTC	29	0.12	0.00057	1		0.0652174	no
ACGTAAGA	54	0.05	0.23593	3		0.0597015	no
ACGTAATC	35	0.12	0.00015	39		0.0784314	no
ACGTAATCA	10	0.44	<E-05	39		0.0666667	no
ACGTAATT	68	0.08	0.00382	3		0.153846	no
ACGTACCG	9	0.14	0.01842	3		0	no
ACGTAGAA	48	0.12	<E-05	1		0.0277778	no
ACGTAGTC	17	0.07	0.12432	3		0.037037	no
ACGTAGTGC	7	0.33	0.00137	1		0.166667	no
ACGTATAAC	9	0.31	0.00017	3		0.214286	no
ACGTATAGC	8	0.39	9e-05	39		0.125	no
ACGTATCC	23	0.15	0.00017	3		0.107143	no
ACGTATG	140	0.07	0.01652	3		0.0465116	no
ACGTATGTG	9	0.39	8e-05	30		0.1	no
ACGTATTC	51	0.05	0.23593	3		0.0588235	no
ACGTCAAA	64	0.06	0.06862	3	SKO1	0.0505051	no
ACGTCATA	35	0.13	3e-05	3	SKO1	0.0961538	no
ACGTCCATA	4	0.67	0.00017	39		0	no
ACGTCCCA	23	0.06	0.15474	3		0	no
ACGTCCCC	4	1	0.00015	19		0	no
ACGTCGTG	10	0.16	0.01819	29		0	no
ACGTCTC	70	0.06	0.06893	3		0.0185185	no
ACGTCTCG	11	0.09	0.11983	3		0	no
ACGTCTG	26	0.1	0.0098	26		0.0421053	no
ACGTCTTAC	7	0.52	2e-05	1		0	no
ACGTCTTACG	7	0.48	2e-05	39		0	no
ACGTCTTACGA	6	0.67	<E-05	39		0	no
ACGTCTTCC	7	0.38	0.00071	40		0	no
ACGTGACG	23	0.09	0.02069	3		0.0416667	no
ACGTGGGG	13	0.14	0.04252	18		0.136364	no
ACGTGTAA	31	0.06	0.13874	3		0.0943396	no
ACGTTATA	60	0.08	0.00382	3		0.0309278	no
ACGTTATAC	10	0.36	3e-05	3		0.181818	no
ACGTTCG	58	0.1	0.00028	1		0.0744681	no
ACGTTCT	148	0.09	0.00067	3	HSF1	0.0681818	no
ACGTTCTG	27	0.1	0.0039	3		0.0208333	no
ACGTTCTT	55	0.1	0.00014	3		0.0958904	no
ACGTTGAA	53	0.08	0.00382	3		0.0361446	no
ACGTTGCTTT	7	0.62	<E-05	1		0	no
ACGTTGCTTTC	6	0.67	<E-05	39		0	no
ACGTTTA	198	0.06	0.06893	3		0.028754	no
ACGTTTCTCT	6	0.67	<E-05	1		0	no
ACTAAAAATT	21	0.22	1e-05	7		0.117647	no
ACTAAACT	37	0.12	0.00143	28		0.00934579	no
ACTAAACTAC	6	0.53	0.00025	34		0	no
ACTAAAGGA	18	0.12	0.0055	3		0	no
ACTAAATG	74	0.06	0.06862	3		0.0224719	no
ACTAACCA	35	0.1	0.00192	39		0.0344828	no
ACTAAGC	113	0.07	0.01652	3		0.0648649	no
ACTAAGGTA	10	0.36	7e-05	24	MOT3	0	no
ACTAATCAA	27	0.14	0.00014	3		0.0606061	no
ACTAATTC	43	0.09	0.0014	3		0.05	no
ACTACTGC	43	0.06	0.08097	3		0	no
ACTACTGGT	12	0.09	0.13685	10		0	no
ACTACTTAGC	7	0.48	2e-05	39		0	no
ACTACTTAGCT	6	0.67	<E-05	39		0	no
ACTAGAATTG	6	0.53	7e-05	39		0	no
ACTAGAC	87	0.08	0.00366	3		0.0162602	no
ACTAGACA	30	0.08	0.0221	3		0.0212766	no
ACTAGCAGA	12	0.36	4e-05	27		0.166667	no
ACTAGCAGAA	6	0.53	7e-05	39		0	no
ACTAGCAGAAG	5	0.8	1e-05	1		NA	yes
ACTAGCTCT	6	0.27	0.00598	40		0	no
ACTAGGCC	21	0.13	0.0055	6		0	no
ACTAGGGG	11	0.42	1e-05	13		0.111111	no
ACTATAAAGC	6	0.4	0.00118	39		0	no
ACTATAGTTA	8	0.25	0.00563	34		0	no
ACTATCATGA	5	1	1e-05	2		0	no
ACTATCCC	24	0.14	0.00027	39		0	no
ACTATCGA	31	0.06	0.13874	3		0	no
ACTATCGC	47	0.06	0.07786	3		0.103448	no
ACTATCTCT	16	0.19	0.00215	15		0	no
ACTATGAAATA	5	0.8	1e-05	1		0	no
ACTATGTA	71	0.08	0.00382	3		0.00847458	no
ACTATTCA	89	0.07	0.01646	3		0.00961538	no
ACTATTCAT	32	0.08	0.01801	3		0.030303	no
ACTATTTTG	43	0.1	0.00028	3		0	no
ACTCAACTTTT	6	1	<E-05	5		0	no
ACTCACG	49	0.05	0.25329	3		0.0666667	no
ACTCAGGG	10	0.33	3e-05	25		0	no
ACTCAGT	116	0.06	0.06893	3		0.05	no
ACTCAGTA	47	0.07	0.01862	3		0.0384615	no
ACTCAGTT	32	0.05	0.30365	3		0.0238095	no
ACTCATCTC	21	0.3	<E-05	23		0.166667	no
ACTCATCTCA	11	0.45	<E-05	16		0.7	yes
ACTCATTG	37	0.07	0.03604	3		0.0754717	no
ACTCATTGT	12	0.15	0.00877	3		0.133333	no
ACTCCAGGTG	6	0.67	<E-05	39	ADR1	0	no
ACTCCAGGTGT	6	0.67	<E-05	39	ADR1	0	no
ACTCCCA	79	0.08	0.00366	3	ADR1	0.0430108	no
ACTCCCT	85	0.09	0.00067	3	ADR1	0.0491803	no
ACTCCCTA	11	0.2	0.00239	3	ADR1	0.0588235	no
ACTCCCTAT	4	0.67	0.0002	3	ADR1	0	no
ACTCCGA	69	0.07	0.01652	3	ADR1	0.193878	no
ACTCCGCT	17	0.06	0.18376	3	ADR1	0	no
ACTCCGGG	14	0.1	0.06632	29	ADR1	0.0454545	no
ACTCCTAC	22	0.06	0.19576	3	ADR1	0	no
ACTCCTCG	21	0.18	0.00034	19	ADR1	0.227273	no
ACTCCTTCCA	7	0.48	2e-05	39	ADR1	0	no
ACTCCTTT	69	0.07	0.01646	3	ADR1	0.0652174	no
ACTCGAC	41	0.07	0.02662	3		0.056338	no
ACTCGAG	60	0.06	0.06893	3		0.0408163	no
ACTCGAGA	24	0.09	0.02511	39		0.0344828	no
ACTCGCCG	16	0.13	0.00553	3		0	no
ACTCGGACACC	6	0.67	<E-05	39		0	no
ACTCGGCA	11	0.09	0.11983	3		0	no
ACTCTATT	71	0.07	0.01646	3		0.0526316	no
ACTCTCGT	13	0.22	0.00031	26		0.037037	no
ACTCTTGC	39	0.05	0.2548	3		0.0566038	no
ACTGAAAAAAA	45	0.14	2e-05	40		0.0821918	no
ACTGAAAGCT	9	0.39	<E-05	39		0	no
ACTGAAAGCTT	6	0.67	<E-05	39		0	no
ACTGAAGT	41	0.1	0.00056	3		0.0169492	no
ACTGACGG	16	0.28	1e-05	10		0.05	no
ACTGACGGA	6	0.73	1e-05	10		0.2	no
ACTGAGCAG	4	0.83	0.00017	39		0	no
ACTGATTTC	17	0.19	0.00016	1		0	no
ACTGCAAC	37	0.07	0.03604	3		0.0566038	no
ACTGCAGCTT	6	0.67	1e-05	13		0.25	yes
ACTGCGGTA	10	0.16	0.02049	27		0	no
ACTGCTACTG	8	0.36	9e-05	39		0	no
ACTGGCG	57	0.06	0.06893	3		0.0222222	no
ACTGGCGCT	6	0.73	1e-05	14		0	no
ACTGGCTTT	12	0.15	0.00877	3		0	no
ACTGGTAGTT	9	0.39	0.0001	34		0	no
ACTGGTCC	8	0.18	0.00681	20	GAL4	0.0588235	no
ACTGGTTGC	10	0.31	0.0003	8		0	no
ACTGTAAA	98	0.07	0.01646	3		0.0703125	no
ACTGTAAAC	24	0.07	0.07497	3		0.105263	no
ACTGTATG	41	0.1	0.00056	3		0.102564	no
ACTGTCTTG	9	0.39	0.0001	7		0	no
ACTGTTGT	36	0.07	0.02787	20		0.0285714	no
ACTTAACA	58	0.08	0.00382	3		0.0238095	no
ACTTACACC	4	0.83	0.00017	39		0	no
ACTTCACAAAA	6	0.67	<E-05	39		0	no
ACTTCACC	9	0.36	0.00023	11		0.02	no
ACTTCCAAG	13	0.29	4e-05	39		0	no
ACTTCCAAGC	6	0.8	<E-05	1		0	no
ACTTCGAT	29	0.08	0.01593	20		0.0517241	no
ACTTCTAG	54	0.06	0.06862	3		0.0606061	no
ACTTCTCA	47	0.09	0.00089	3		0.0333333	no
ACTTCTGA	38	0.11	0.00037	1		0	no
ACTTCTTCACT	9	0.36	4e-05	39		0	no
ACTTGATG	50	0.07	0.01646	3		0.0289855	no
ACTTGATTC	14	0.18	0.00083	3		0.047619	no
ACTTGGCCC	4	0.67	0.00017	39		0	no
ACTTGTATA	35	0.1	0.00134	3		0.125	no
ACTTTAGCC	6	0.47	0.00012	3		0	no
ACTTTCGA	44	0.1	0.00035	3		0.0377358	no
ACTTTCGGAA	5	1	<E-05	13		0.5	yes
AGAAAAATT	99	0.1	0.00133	16		0.0294118	no
AGAAAACAG	41	0.09	0.0019	3		0.107692	no
AGAAAACAGG	7	0.43	5e-05	3		0.181818	no
AGAAAACGA	38	0.11	0.00024	3		0.0232558	no
AGAAAAGCACT	7	0.48	2e-05	39		0	no
AGAAAATTTT	57	0.2	<E-05	16		0.226804	no
AGAAAATTTTC	22	0.36	<E-05	7		0.347826	yes
AGAAAATTTTT	53	0.18	<E-05	10		0.25	yes
AGAAACTCTT	8	0.29	0.00282	23		0	no
AGAAAGAAT	62	0.09	0.0007	3		0.0333333	no
AGAACAAAGTA	7	0.48	2e-05	39		0	no
AGAACAAGGAA	6	0.73	<E-05	19		0	no
AGAACAC	192	0.07	0.01652	3		0.0377358	no
AGAACACC	41	0.12	8e-05	3		0.0508475	no
AGAACACCA	22	0.16	0.00019	3		0.0333333	no
AGAACATAC	24	0.16	5e-05	39		0.0689655	no
AGAACATGC	9	0.33	0.00017	3		0	no
AGAACGCA	49	0.06	0.071	3		0.016129	no
AGAACGCGT	10	0.36	4e-05	39		0.1	no
AGAACTAA	81	0.06	0.06862	3		0.0114943	no
AGAACTTC	51	0.07	0.01646	3		0.0266667	no
AGAAGAAC	115	0.08	0.00382	3		0.0763889	no
AGAAGAGC	70	0.06	0.06862	3		0.05	no
AGAAGCTC	57	0.12	6e-05	8		0.0425532	no
AGAAGGCTTG	6	0.53	7e-05	39		0	no
AGAAGGCTTGA	5	0.8	1e-05	1		NA	yes
AGAAGGGA	97	0.08	0.00382	3		0.0252101	no
AGAAGGTG	61	0.06	0.06862	3		0.016129	no
AGAAGTGA	88	0.08	0.00382	3		0.0176991	no
AGAAGTGAA	51	0.12	2e-05	24		0.0208333	no
AGAAGTGAGA	9	0.39	7e-05	24		0	no
AGAAGTGC	31	0.12	0.00028	25		0.0588235	no
AGAAGTGGG	11	0.29	0.00011	39		0	no
AGAAGTTC	53	0.07	0.01646	3		0.0652174	no
AGAATAAAGAA	9	0.36	0.0001	3		0	no
AGAATCAAG	26	0.1	0.00524	3		0	no
AGAATGGT	60	0.07	0.01646	3		0.0724638	no
AGACACTC	20	0.06	0.18147	3		0	no
AGACAGAAA	31	0.12	0.00033	3		0.030303	no
AGACAGTG	24	0.13	0.0008	39		0	no
AGACAGTT	41	0.09	0.0019	3		0.015625	no
AGACATAG	30	0.09	0.00765	3		0.030303	no
AGACCAAG	30	0.12	0.00055	1		0	no
AGACCACA	22	0.14	0.00057	3		0	no
AGACCAG	68	0.07	0.01652	3		0.00854701	no
AGACCCATC	6	0.47	7e-05	39		0	no
AGACCCCATT	8	0.36	9e-05	39	ADR1	0	no
AGACCCCATTA	6	0.67	<E-05	1	ADR1	0	no
AGACCGAAA	8	0.25	0.00315	3		0.166667	no
AGACCTGCA	5	0.8	1e-05	19		0	no
AGACGAAGA	24	0.21	3e-05	7		0.0384615	no
AGACGACT	8	0.25	0.00315	3		0	no
AGACGATTA	9	0.14	0.02729	24		0.0625	no
AGACGCGA	20	0.22	<E-05	1	STB1	0.225806	no
AGACGGA	95	0.08	0.00366	3		0.0461538	no
AGACGGAG	23	0.12	0.00165	3		0	no
AGACGGGG	13	0.08	0.0933	3		0.0769231	no
AGACGGGGT	6	0.67	<E-05	34	ADR1	0	no
AGACGTC	48	0.06	0.07508	3		0.0142857	no
AGACGTCCA	8	0.5	<E-05	1		0	no
AGACGTT	45	0.09	0.00295	26		0.03125	no
AGACTTA	120	0.06	0.06893	3		0.021978	no
AGACTTCT	38	0.11	0.00037	1		0.0204082	no
AGACTTGT	38	0.14	2e-05	8		0	no
AGAGACC	71	0.08	0.00366	3		0.027027	no
AGAGACCC	22	0.12	0.00271	3		0	no
AGAGATCA	50	0.1	0.00014	3		0.0434783	no
AGAGATCAC	9	0.25	0.00173	3		0	no
AGAGATGA	58	0.13	4e-05	28		0.164384	no
AGAGATGAG	50	0.14	<E-05	19		0.355556	yes
AGAGATGAGAT	9	0.69	<E-05	7		0.5	yes
AGAGATGAGCT	9	0.53	<E-05	15		0.875	yes
AGAGATGT	49	0.07	0.01634	3		0.0405405	no
AGAGCCTC	23	0.03	0.79195	3		0	no
AGAGCTAC	13	0.18	0.00083	25		0.0285714	no
AGAGCTAG	22	0.13	0.00344	40		0	no
AGAGCTTG	36	0.1	0.00121	3		0	no
AGAGGCCTG	12	0.39	<E-05	34		0	no
AGAGGGG	105	0.08	0.00366	3		0.176871	no
AGAGGGGA	49	0.07	0.01634	3		0.183333	no
AGAGGGGT	25	0.19	6e-05	19	ADR1	0.0740741	no
AGAGGGGTA	9	0.36	0.00033	19	ADR1	0.0833333	no
AGAGGTCG	15	0.14	0.00591	1		0.0384615	no
AGAGTACT	43	0.08	0.00603	3		0.0178571	no
AGAGTGCAC	4	0.83	0.00017	39		0	no
AGAGTTGG	20	0.13	0.00197	3		0	no
AGAGTTGGA	7	0.38	0.00047	3		0	no
AGAGTTTA	71	0.06	0.06862	3		0.0111111	no
AGATAAAGTG	10	0.31	0.00035	35	DAL80	0.0909091	no
AGATACAT	52	0.12	0.00011	16		0.0185185	no
AGATAGGC	25	0.15	0.00014	3		0.0294118	no
AGATAGGG	20	0.1	0.01633	3		0.0277778	no
AGATAGTAG	13	0.22	0.00038	39		0.0769231	no
AGATATTTG	33	0.14	3e-05	3		0.0444444	no
AGATCACAG	11	0.27	0.00022	39		0.133333	no
AGATCCCT	21	0.12	0.0029	3		0.0769231	no
AGATCCTAAAT	6	0.67	<E-05	39		0	no
AGATCGATAT	6	0.67	1e-05	13		0	no
AGATCGCA	26	0.13	0.0004	3		0.0645161	no
AGATCGGA	17	0.26	4e-05	2		0	no
AGATCGTC	15	0.09	0.05113	3		0.0416667	no
AGATCTTAGT	8	0.29	0.00127	7		0.333333	yes
AGATCTTAGTA	8	0.29	0.00127	7		0.333333	yes
AGATGAAAA	53	0.14	<E-05	16		0.0535714	no
AGATGAAAAA	47	0.14	2e-05	19		0.12069	no
AGATGAAAAT	12	0.35	<E-05	40		0	no
AGATGAAAT	41	0.14	3e-05	19		0.108696	no
AGATGAG	187	0.12	<E-05	25		0.288095	yes
AGATGAGATG	49	0.23	<E-05	10		0.6875	yes
AGATGAGC	69	0.2	<E-05	16		0.356436	yes
AGATGAGCA	17	0.18	0.00034	22		0.0909091	no
AGATGAGCC	17	0.2	0.0001	39		0.105263	no
AGATGAGCCT	9	0.53	<E-05	39		0.428571	yes
AGATGAGCT	44	0.17	<E-05	10		0.413043	yes
AGATGAGCTA	9	0.69	<E-05	16		0.6	yes
AGATGAGCTAA	7	0.62	<E-05	16		0.444444	yes
AGATGAGCTG	16	0.31	<E-05	19		0.470588	yes
AGATGAGG	52	0.15	<E-05	16		0.108434	no
AGATGAGGTG	17	0.29	<E-05	17		0.333333	yes
AGATGAGT	29	0.13	0.00205	28		0.0735294	no
AGATGAGTAC	6	0.67	<E-05	8		0.166667	no
AGATGAGTC	12	0.42	<E-05	31		0.1	no
AGATGAGTCT	9	0.42	<E-05	31		0	no
AGATGAGTCTT	6	1	<E-05	31		NA	yes
AGATGCAT	45	0.13	8e-05	19		0	no
AGATGCATT	10	0.42	1e-05	7		0	no
AGATGGC	94	0.07	0.07186	40		0.126582	no
AGATGGCC	23	0.19	5e-05	19		0	no
AGATGGT	141	0.07	0.01652	3		0.0223214	no
AGATGGTATG	8	0.36	9e-05	39		0	no
AGATGTACT	24	0.16	0.00029	7		0	no
AGATTAGAAT	4	1	6e-05	39		0.166667	no
AGATTGATGT	6	0.67	<E-05	1		NA	yes
AGATTGATGTT	5	0.8	1e-05	1		NA	yes
AGATTGGCA	8	0.36	0.00015	3	HAP2	0	no
AGATTGGCGC	5	0.8	1e-05	1	HAP2	NA	yes
AGATTGGCGCG	5	0.8	1e-05	1	HAP2	NA	yes
AGATTTAAA	27	0.13	0.00037	3		0	no
AGCAAAAGA	29	0.11	0.00135	25		0	no
AGCAAAATC	8	0.46	4e-05	25		0.0333333	no
AGCAAACA	124	0.07	0.01646	3		0.0174419	no
AGCAAACTA	20	0.19	<E-05	14		0	no
AGCAAACTAC	6	0.93	<E-05	14		0	no
AGCAAACTACC	6	0.93	<E-05	14		0	no
AGCAACATCA	6	0.73	<E-05	39		0	no
AGCAACATCAA	5	0.8	1e-05	1		0	no
AGCAAGCAGA	9	0.42	<E-05	31		0	no
AGCAAGCG	38	0.08	0.00963	3		0	no
AGCAAGTT	48	0.07	0.019	3		0	no
AGCAATATCT	6	0.67	<E-05	29		0	no
AGCAATCC	23	0.11	0.00641	1		0.0810811	no
AGCAATCCA	8	0.14	0.0619	39		0.125	no
AGCACATAA	16	0.15	0.01048	27		0.166667	no
AGCACCAAGA	7	0.48	1e-05	31		0.5	yes
AGCACCAT	28	0.12	0.00059	39		0	no
AGCACCGG	13	0.13	0.00959	3		0	no
AGCACGA	99	0.06	0.06893	3		0.0496894	no
AGCACGAG	15	0.11	0.01905	3		0	no
AGCACGGG	8	0.25	0.00372	1		0	no
AGCACTTATAA	7	0.48	2e-05	39		0.2	no
AGCAGAAGGCT	6	0.53	7e-05	39		NA	yes
AGCAGACC	20	0.19	1e-05	1		0	no
AGCAGACCCCA	6	0.67	<E-05	39	ADR1	0	no
AGCAGATAATG	5	1	<E-05	33	DAL80	0	no
AGCAGCAC	28	0.12	0.00054	25		0.0566038	no
AGCAGCACCAA	6	0.67	<E-05	34		NA	yes
AGCAGCAT	38	0.1	0.00088	3		0.0204082	no
AGCAGCTA	42	0.08	0.00682	3		0.0454545	no
AGCAGGC	80	0.07	0.01652	3		0.0342466	no
AGCAGTGT	44	0.14	3e-05	7	GAL4	0.0652174	no
AGCAGTTCGA	8	0.39	9e-05	39		0	no
AGCAGTTCGAC	6	0.67	<E-05	39		0	no
AGCATACT	45	0.06	0.07927	3		0.0625	no
AGCATATTC	27	0.17	4e-05	34		0	no
AGCATCAA	64	0.06	0.06862	3		0	no
AGCATGC	78	0.06	0.06893	3		0.0671642	no
AGCATGCA	37	0.11	0.00046	1		0.0925926	no
AGCATGCC	18	0.1	0.01816	3		0.047619	no
AGCATTGT	43	0.08	0.00603	3		0.0151515	no
AGCCAATC	50	0.13	2e-05	35	HAP2	0.192982	no
AGCCAGCA	32	0.18	<E-05	39	SWI5	0.0625	no
AGCCAGTA	33	0.08	0.01436	3		0.0454545	no
AGCCATCG	21	0.13	0.00173	39		0.206897	no
AGCCCAGG	15	0.28	3e-05	16		0.133333	no
AGCCCAGGC	6	0.67	<E-05	16		0	no
AGCCCATC	47	0.11	0.00045	8		0	no
AGCCCATTG	9	0.39	1e-05	21		0	no
AGCCCCA	43	0.06	0.08131	3		0.114754	no
AGCCCCCT	14	0.18	0.00083	3	ADR1	0.105263	no
AGCCCTGG	18	0.25	9e-05	2		0.0555556	no
AGCCGAG	47	0.08	0.0048	3		0.0454545	no
AGCCGCA	77	0.07	0.01652	3		0.188811	no
AGCCGCGC	30	0.17	<E-05	34		0.147059	no
AGCCGGG	50	0.1	0.00013	3		0.0804598	no
AGCCGTCC	11	0.18	0.00447	3		0.153846	no
AGCCGTTC	12	0.17	0.00399	26		0.142857	no
AGCCTAGAC	8	0.36	9e-05	39		0	no
AGCCTGCC	9	0.36	2e-05	25		0	no
AGCCTTCCT	10	0.38	4e-05	24		0	no
AGCGACACAA	5	1	1e-05	2		0.166667	no
AGCGACAT	20	0.12	0.00383	3		0.0454545	no
AGCGAGATC	7	0.67	<E-05	13		0	no
AGCGAGATCT	6	0.67	<E-05	34		0	no
AGCGAGATCTT	5	1	<E-05	13		0	no
AGCGAGCCAA	7	0.38	0.00058	14		0	no
AGCGAGT	70	0.06	0.06893	3		0.0412371	no
AGCGATG	133	0.15	<E-05	16		0.247012	yes
AGCGATGAGAT	22	0.74	<E-05	15		0.894737	yes
AGCGATGAGGT	5	0.8	<E-05	20		0.6	yes
AGCGATGC	34	0.11	0.00275	16		0.171429	no
AGCGCACT	11	0.04	0.41606	3		0	no
AGCGCCAA	31	0.1	0.00241	3		0.0222222	no
AGCGCCAGTT	5	0.8	<E-05	14		0	no
AGCGCCGG	11	0.15	0.00826	3		0.25	yes
AGCGCCTC	21	0.12	0.01787	23		0.105263	no
AGCGCGAAAA	11	0.25	0.00051	14		0.333333	yes
AGCGCTTGCT	7	0.48	2e-05	34		0	no
AGCGGAC	45	0.08	0.00471	3		0.1	no
AGCGGACC	8	0.18	0.00902	39		0.0625	no
AGCGGAG	49	0.08	0.00095	20		0.00909091	no
AGCGGAGA	31	0.06	0.13874	3		0.0263158	no
AGCGGATA	31	0.06	0.13874	3		0.0285714	no
AGCGGGC	63	0.09	0.00067	3		0.229885	no
AGCGGGCA	21	0.12	0.0029	3		0.24	no
AGCGTGCCTG	6	0.67	<E-05	39	MOT3	0	no
AGCGTGGA	19	0.09	0.0297	3		0.115385	no
AGCGTGGGG	9	0.5	4e-05	23		0.0588235	no
AGCGTTTG	20	0.09	0.02366	3		0.05	no
AGCTAAACA	17	0.17	0.00041	3		0	no
AGCTAAGT	27	0.12	0.00075	39		0	no
AGCTAAGTA	12	0.29	3e-05	39		0	no
AGCTAATTC	15	0.28	3e-05	39		0	no
AGCTAATTCC	7	0.48	2e-05	39		0	no
AGCTAATTCCT	6	0.67	<E-05	39		0	no
AGCTACCAT	8	0.36	0.00015	3		0	no
AGCTAGAA	42	0.07	0.02391	3		0.0853659	no
AGCTAGGG	14	0.29	1e-05	14		0.08	no
AGCTATAG	45	0.09	0.00111	3		0.0136986	no
AGCTCAT	212	0.17	<E-05	16		0.263666	yes
AGCTCATA	36	0.08	0.01162	3		0.0434783	no
AGCTCATCGA	19	0.3	<E-05	16		0.4375	yes
AGCTCATCGAT	15	0.35	<E-05	18		0.222222	no
AGCTCATCGCA	45	0.17	<E-05	10		0.648649	yes
AGCTCATCGCT	12	0.65	<E-05	17		0.833333	yes
AGCTCATCTT	6	0.8	<E-05	7		0.571429	yes
AGCTCCC	63	0.07	0.01652	3		0.0487805	no
AGCTCGTT	15	0.09	0.08452	16		0.0645161	no
AGCTCTG	52	0.08	0.00762	22		0.015748	no
AGCTCTTAAGG	7	0.52	2e-05	39		0	no
AGCTCTTG	49	0.08	0.00327	3		0.0298507	no
AGCTGAGC	25	0.23	<E-05	7		0	no
AGCTGCTA	52	0.07	0.01646	3		0.0327869	no
AGCTGGCAG	9	0.17	0.00765	3		0.1	no
AGCTGTACTA	7	0.48	2e-05	39		0	no
AGCTGTT	158	0.07	0.01652	3		0.0555556	no
AGCTTACC	33	0.09	0.00506	3		0.047619	no
AGCTTCCA	59	0.11	0.00189	33		0.0615385	no
AGCTTGCAT	10	0.38	5e-05	16		0	no
AGCTTTCAGTT	7	0.48	2e-05	39		0	no
AGGAAAATTTC	6	0.73	<E-05	24		0	no
AGGAAACG	61	0.08	0.00382	3	SIG1	0.0526316	no
AGGAACTG	28	0.11	0.00047	20		0.0392157	no
AGGAACTGA	14	0.22	0.00013	1		0.0714286	no
AGGAACTGAG	7	0.62	<E-05	39		0	no
AGGAACTT	60	0.07	0.01646	3		0.0555556	no
AGGAATTAGC	6	0.67	<E-05	39		0	no
AGGACAAT	55	0.07	0.01646	3		0.0724638	no
AGGACCCT	24	0.09	0.0116	20	NRG1	0.289474	yes
AGGACCGA	16	0.12	0.00888	3		0.0909091	no
AGGACGT	61	0.05	0.2364	3		0.0117647	no
AGGACGTG	21	0.06	0.18552	3		0	no
AGGACGTTC	7	0.52	2e-05	14		0	no
AGGACTCGA	6	0.4	0.00151	3		0	no
AGGACTTGGA	6	0.67	1e-05	31		0	no
AGGAGAAC	38	0.08	0.00963	3		0.112903	no
AGGAGAAT	63	0.06	0.06862	3		0.0340909	no
AGGAGAG	157	0.07	0.01652	3		0.0519481	no
AGGAGAGACA	8	0.54	<E-05	4		0.142857	no
AGGAGAGC	25	0.11	0.00312	3		0.0232558	no
AGGAGCG	62	0.09	0.00067	3		0.0490196	no
AGGAGGAG	32	0.09	0.00647	3	ADR1	0.0638298	no
AGGAGGC	49	0.07	0.01006	20	ADR1	0.0818182	no
AGGAGGCGC	6	0.4	0.00374	15	ADR1	0	no
AGGAGGTG	15	0.22	0.00013	3	ADR1	0	no
AGGAGTGCTG	6	0.67	<E-05	39	ADR1	0	no
AGGAGTGCTGT	6	0.67	<E-05	39	ADR1	0	no
AGGATCAC	13	0.33	<E-05	37		0.0344828	no
AGGCACA	116	0.06	0.06893	3		0.114583	no
AGGCACAC	25	0.12	0.00131	3		0.0666667	no
AGGCAGAGCA	8	0.5	1e-05	31		0	no
AGGCCAAT	28	0.12	0.00059	39	HAP2	0	no
AGGCCAGT	20	0.06	0.18147	3		0	no
AGGCCCC	31	0.1	0.00246	3		0.0909091	no
AGGCCCG	35	0.12	0.00012	3		0.0526316	no
AGGCCCGC	9	0.36	0.0001	3		0	no
AGGCCCTC	6	0.4	0.00151	3		0.142857	no
AGGCCTCG	11	0.09	0.14182	21		0.0666667	no
AGGCCTCTT	7	0.57	<E-05	14		0	no
AGGCCTGAG	4	1	5e-05	34		0	no
AGGCGCA	34	0.12	0.00049	26		0.131579	no
AGGCGCCT	10	0.11	0.1258	23		0	no
AGGCGCGT	23	0.21	8e-05	23		0.105263	no
AGGCGGC	55	0.1	0.00013	3	STP1	0.0864198	no
AGGCGTCGG	9	0.31	0.00015	39		0	no
AGGCGTCGGA	6	0.67	<E-05	39		0.25	yes
AGGCGTCGGAA	6	0.67	<E-05	39		0	no
AGGCTCATCTT	7	0.48	2e-05	39		0	no
AGGCTCT	105	0.05	0.2364	3		0.0229008	no
AGGCTGTA	35	0.12	0.00015	3		0.0512821	no
AGGCTGTC	11	0.4	1e-05	30		0.0666667	no
AGGCTTGAAAT	8	0.43	2e-05	39		0	no
AGGGAAAAG	50	0.1	0.00014	3		0.031746	no
AGGGAAAAGG	15	0.38	<E-05	3		0.1	no
AGGGAAGGAC	6	0.87	<E-05	13		1	yes
AGGGAAT	142	0.07	0.01652	3		0.0699588	no
AGGGAATT	42	0.1	0.00041	3		0.0952381	no
AGGGACA	43	0.1	0.00088	26		0.122905	no
AGGGACCT	20	0.14	0.00124	1		0.178571	no
AGGGACG	52	0.07	0.01652	3		0.0704225	no
AGGGACGA	24	0.12	0.00135	3		0.0689655	no
AGGGAGA	160	0.08	0.00366	3		0.0779817	no
AGGGAGC	106	0.1	0.00013	3		0.0884956	no
AGGGAGCA	45	0.1	0.00038	3		0.0487805	no
AGGGAGCG	22	0.12	0.00271	3		0.105263	no
AGGGAGGA	18	0.15	0.00128	3	ADR1	0.0857143	no
AGGGATAC	31	0.1	0.00241	3		0.209302	no
AGGGATCAC	9	0.42	<E-05	4		0	no
AGGGATCCT	8	0.14	0.07256	24		0	no
AGGGCAGG	24	0.12	0.00135	3		0.151515	no
AGGGCCAA	18	0.2	0.00011	26		0.0408163	no
AGGGCCCC	10	0.31	0.00018	1		0.117647	no
AGGGCCCT	19	0.15	0.00075	39		0.0666667	no
AGGGCCTC	19	0.13	0.00211	3		0.05	no
AGGGCCTCC	4	0.83	0.0002	3		0.25	yes
AGGGCGG	53	0.11	2e-05	3	STP1	0.097561	no
AGGGCGGG	13	0.13	0.01097	39		0.0526316	no
AGGGCGT	58	0.08	0.00366	3		0.0375	no
AGGGGAAA	57	0.07	0.01022	20		0.119266	no
AGGGGAAATCA	7	0.48	2e-05	39		0	no
AGGGGAAT	44	0.14	6e-05	28		0.09375	no
AGGGGAT	53	0.15	<E-05	26		0.139706	no
AGGGGATA	45	0.16	<E-05	6		0.0810811	no
AGGGGATAA	9	0.42	1e-05	26	DAL80	0.1875	no
AGGGGATCA	9	0.44	1e-05	3		0	no
AGGGGATT	26	0.22	<E-05	1		0.0789474	no
AGGGGATTA	14	0.24	9e-05	3		0.2	no
AGGGGATTG	6	0.53	0.00019	1		0	no
AGGGGCA	79	0.1	<E-05	20		0.217391	no
AGGGGCAA	38	0.11	0.00024	3		0.26087	yes
AGGGGCAAG	14	0.25	0.0006	23		0.222222	no
AGGGGCAG	29	0.17	1e-05	3		0.106383	no
AGGGGCAGG	12	0.26	0.00117	13		0.25	yes
AGGGGCG	76	0.1	0.00013	3	MSN2	0.224138	no
AGGGGCGA	28	0.17	0.00013	17		0.235294	no
AGGGGCGG	28	0.15	6e-05	3	MSN2	0.097561	no
AGGGGCGGA	7	0.43	5e-05	3		0.111111	no
AGGGGCT	70	0.1	0.00013	3		0.212766	no
AGGGGCTG	17	0.22	9e-05	3		0.32	yes
AGGGGCTT	21	0.1	0.01445	3		0.166667	no
AGGGGGA	88	0.12	<E-05	3	ADR1	0.0967742	no
AGGGGGAT	18	0.24	1e-05	3	ADR1	0.193548	no
AGGGGGATA	7	0.52	<E-05	3	ADR1	0	no
AGGGGGCA	20	0.16	0.00281	23	ADR1	0	no
AGGGGGCC	9	0.78	<E-05	23	ADR1	0	no
AGGGGGCG	13	0.37	2e-05	23	ADR1	0.214286	no
AGGGGGG	79	0.13	<E-05	3	ADR1	0.0707071	no
AGGGGGGA	29	0.17	1e-05	3	ADR1	0.0526316	no
AGGGGGGG	23	0.17	0.00017	40	ADR1	0	no
AGGGGGT	58	0.14	<E-05	3	ADR1	0.025	no
AGGGGGTA	13	0.18	0.00127	3	ADR1	0.0666667	no
AGGGGGTGG	12	0.33	0.00014	23	ADR1	0	no
AGGGGGTT	20	0.25	<E-05	3	ADR1	0	no
AGGGGTAAA	6	0.87	<E-05	26	ADR1	0.166667	no
AGGGGTAAAA	5	0.8	1e-05	26	ADR1	0.4	yes
AGGGGTAG	28	0.1	0.0314	23	ADR1	0.117647	no
AGGGGTGC	9	0.08	0.26124	40	ADR1	0.0714286	no
AGGGGTGCT	4	0.83	0.0002	3	ADR1	0	no
AGGGGTT	94	0.13	<E-05	3	ADR1	0.21374	no
AGGGGTTC	19	0.23	3e-05	19	ADR1	0.0454545	no
AGGGGTTCT	9	0.28	0.00101	19	ADR1	0.0909091	no
AGGGGTTG	27	0.23	<E-05	3	ADR1	0.1875	no
AGGGTAAAG	15	0.22	0.00014	39		0.190476	no
AGGGTCTT	46	0.1	0.00036	1		0.230769	no
AGGGTGAG	24	0.14	0.00027	39		0.2	no
AGGGTTC	100	0.08	0.00366	3		0.14094	no
AGGGTTCC	15	0.1	0.0314	3		0.0833333	no
AGGGTTGA	37	0.08	0.12144	18		0	no
AGGGTTTCA	12	0.14	0.00877	3		0	no
AGGTAAACA	47	0.1	0.00036	39	FKH2	0.318182	yes
AGGTAAACAA	32	0.16	1e-05	39	FKH1	0.433333	yes
AGGTAAACAAA	17	0.25	<E-05	39	FKH1	0.411765	yes
AGGTAATGTTT	6	0.67	<E-05	39		0	no
AGGTAGAT	40	0.1	0.00071	3		0.0185185	no
AGGTCGCGT	4	1	5e-05	34		0	no
AGGTCTAGGCT	6	0.67	<E-05	39		0	no
AGGTGAGG	39	0.13	0.00099	23		0.047619	no
AGGTGGCA	30	0.12	0.00037	25		0.113636	no
AGGTGGTA	25	0.07	0.08349	3		0	no
AGGTGGTC	14	0.31	2e-05	27		0.0434783	no
AGGTGTAGTT	6	0.73	<E-05	5		0	no
AGGTGTCAA	16	0.27	<E-05	39		0.0625	no
AGGTGTCAAAA	6	0.67	<E-05	39		0	no
AGGTTAAA	78	0.06	0.06862	3		0.0366972	no
AGGTTAGA	42	0.08	0.00682	3		0	no
AGGTTATGA	16	0.3	1e-05	15		0	no
AGGTTCAT	59	0.08	0.00382	3		0	no
AGGTTGC	45	0.11	0.00016	37		0.048951	no
AGGTTGTG	28	0.14	0.00014	1		0.0243902	no
AGGTTTTG	42	0.1	6e-05	20		0.0138889	no
AGGTTTTGTG	8	0.36	9e-05	39		0	no
AGTAAAAAGT	12	0.3	0.00014	30		0.0967742	no
AGTAAATACA	11	0.09	0.11983	3		0.0769231	no
AGTAACAAA	39	0.09	0.00281	3		0.0652174	no
AGTAACTA	49	0.06	0.071	3		0	no
AGTAAGAACA	12	0.24	0.00116	2		0.0833333	no
AGTAAGTC	28	0.1	0.00466	3		0	no
AGTAATCTTT	6	0.67	1e-05	13		0	no
AGTACAGCTAA	6	0.67	<E-05	39		0	no
AGTACCAGTT	6	0.67	<E-05	5		0	no
AGTACCCG	14	0.12	0.01792	3		0.0454545	no
AGTACCCGA	7	0.48	4e-05	24		0	no
AGTACGTA	52	0.09	0.0007	3		0.0684932	no
AGTACTCA	50	0.07	0.01646	3		0.05	no
AGTAGCAGTT	8	0.36	9e-05	39		0	no
AGTAGCAGTTC	6	0.67	<E-05	39		0	no
AGTAGCTA	19	0.19	2e-05	20		0.0163934	no
AGTAGCTT	52	0.07	0.01646	3		0.0119048	no
AGTAGCTTA	16	0.14	0.00383	3		0.05	no
AGTAGGAC	22	0.09	0.02266	3		0.0333333	no
AGTAGGG	86	0.08	0.00366	3		0.0336134	no
AGTAGGTT	40	0.08	0.00817	3		0.0566038	no
AGTAGTTG	55	0.1	0.00014	3		0	no
AGTATATAA	74	0.11	2e-05	3		0.136842	no
AGTATCAGTA	8	0.36	9e-05	39		0	no
AGTATCAGTAG	6	0.67	<E-05	39		0	no
AGTATCGT	13	0.22	4e-05	20		0.0263158	no
AGTCAAAG	49	0.07	0.01634	3	ASH1	0.0169492	no
AGTCAAGCG	8	0.29	0.00069	1	ASH1	0	no
AGTCAATA	73	0.08	0.00382	3	ASH1	0.036036	no
AGTCAGA	117	0.08	0.00366	3	ASH1	0.0197368	no
AGTCAGTC	18	0.12	0.0055	3	ASH1	0.0285714	no
AGTCATCG	36	0.11	0.00195	16		0.140351	no
AGTCCAG	40	0.14	<E-05	3		0.0526316	no
AGTCCAGG	6	0.27	0.00392	3		0	no
AGTCCAGT	13	0.28	1e-05	3		0	no
AGTCCATC	13	0.22	0.00026	3		0.142857	no
AGTCCCAG	11	0.18	0.00447	3		0	no
AGTCCCC	50	0.15	1e-05	27		0	no
AGTCCCCT	14	0.15	0.00201	20		0	no
AGTCCCCTA	10	0.53	<E-05	27		0	no
AGTCCGA	43	0.06	0.08131	3		0.146667	no
AGTCCGCC	11	0.13	0.01602	3		0	no
AGTCCGGT	11	0.16	0.00963	39		0	no
AGTCCGTAA	7	0.48	4e-05	8		0	no
AGTCGTG	39	0.11	0.00155	40		0.0365854	no
AGTCTAA	108	0.06	0.06893	3		0.0314465	no
AGTCTCC	74	0.07	0.01652	3		0.0581395	no
AGTCTCCG	9	0.14	0.01842	3		0.125	no
AGTCTCTC	22	0.16	0.00013	39		0.0333333	no
AGTCTGC	75	0.07	0.01652	3		0	no
AGTCTGCA	23	0.07	0.0898	3		0	no
AGTCTGGC	22	0.16	0.00019	3		0	no
AGTCTGGCT	10	0.27	0.00046	3		0	no
AGTCTTAT	41	0.1	0.00056	3		0	no
AGTCTTATCG	7	0.67	<E-05	13	DAL80	0	no
AGTCTTATCGG	5	1	<E-05	13	DAL80	NA	yes
AGTGAAAC	61	0.06	0.06862	3		0	no
AGTGAACA	43	0.09	0.0014	3		0.015873	no
AGTGAAGAAG	18	0.2	5e-05	1		0	no
AGTGACGCG	8	0.43	1e-05	1		0	no
AGTGACTCA	7	0.43	9e-05	1	BAS1	0.133333	no
AGTGATATA	42	0.15	6e-05	23		0.0434783	no
AGTGCAAAACT	7	0.48	2e-05	39		0.166667	no
AGTGCATC	19	0.08	0.06242	3		0.0689655	no
AGTGCATTTTT	6	0.6	0.00016	5		0	no
AGTGCCCG	7	0.43	5e-05	3		0	no
AGTGCCCGT	7	0.43	5e-05	3		0	no
AGTGCTCCC	5	0.8	1e-05	39		0.166667	no
AGTGCTGTAT	5	0.8	1e-05	1		0	no
AGTGCTGTATG	6	0.67	<E-05	39		0	no
AGTGCTT	202	0.07	0.01652	3		0.0133779	no
AGTGCTTG	37	0.08	0.01083	3		0	no
AGTGGCAT	34	0.09	0.00732	39		0.0512821	no
AGTGGGC	69	0.07	0.01652	3		0.021978	no
AGTGGGCA	26	0.1	0.00524	3		0	no
AGTGGTTC	33	0.06	0.30526	15		0	no
AGTGTATGCA	8	0.39	9e-05	39		0.166667	no
AGTGTCAGG	8	0.25	0.0116	18		0	no
AGTGTGAC	23	0.09	0.02069	3		0	no
AGTGTTC	164	0.07	0.01652	3		0.033195	no
AGTGTTCG	23	0.15	0.00017	3		0.0238095	no
AGTGTTGCG	6	0.47	0.00019	1		0	no
AGTTAAAAT	46	0.05	0.25912	3		0	no
AGTTAGATC	8	0.68	2e-05	13		0	no
AGTTATAAGT	10	0.33	0.00012	39		0.111111	no
AGTTATAAGTG	6	0.67	<E-05	39		0.333333	yes
AGTTATAC	55	0.07	0.01646	3		0.0227273	no
AGTTATCCC	6	0.6	0.00012	24	DAL80	0	no
AGTTATCG	24	0.13	0.00076	3	DAL80	0.0731707	no
AGTTCAGA	34	0.07	0.03941	3		0.030303	no
AGTTCCG	60	0.07	0.01652	3		0.13913	no
AGTTCCTA	16	0.2	0.00026	26		0.0535714	no
AGTTCCTAT	9	0.42	1e-05	35		0.111111	no
AGTTCGACAC	6	0.67	<E-05	39		0	no
AGTTCGACACA	6	0.67	<E-05	39		0	no
AGTTCGATA	12	0.33	6e-05	16		0	no
AGTTGAGC	6	0.47	0.00023	37		0.12	no
AGTTGATCA	23	0.23	4e-05	23		0	no
AGTTGCGG	23	0.12	0.00165	3		0.12	no
AGTTGGAG	30	0.11	0.00144	3		0.146341	no
AGTTTAGAA	16	0.11	0.01399	3		0	no
AGTTTATC	58	0.07	0.01646	3	DAL80	0.0581395	no
AGTTTATCAA	12	0.27	0.00019	8	DAL80	0.166667	no
AGTTTGAA	47	0.12	0.00038	28		0.0542636	no
AGTTTGCAAA	10	0.36	3e-05	1		0	no
AGTTTGTG	65	0.13	6e-05	2		0.0491803	no
AGTTTGTGT	24	0.2	4e-05	2		0.05	no
AGTTTTAGG	16	0.2	0.00016	1		0	no
AGTTTTAGGTA	7	0.48	2e-05	39	MOT3	0	no
AGTTTTTTA	50	0.12	1e-05	3		0.015873	no
ATAAAAACCTC	6	0.53	7e-05	39		0	no
ATAAAACGCG	7	0.48	2e-05	39		0	no
ATAAAATTTTC	12	0.17	0.00711	19		0.272727	yes
ATAAACATT	38	0.12	0.0001	1		0.0212766	no
ATAAAGACAGC	5	0.8	1e-05	1		NA	yes
ATAAAGGGA	48	0.09	0.01895	23		0.111111	no
ATAAAGTTTA	22	0.26	<E-05	24		0.05	no
ATAACACG	25	0.05	0.34751	3		0.0243902	no
ATAACACT	57	0.07	0.01646	3		0.0133333	no
ATAACCAC	34	0.05	0.2657	3		0	no
ATAACGAG	37	0.14	<E-05	39		0.0196078	no
ATAACGGC	35	0.08	0.01303	3	STP1	0.2	no
ATAACTTG	53	0.08	0.00382	3		0.0340909	no
ATAAGACGG	16	0.07	0.08368	3		0.0869565	no
ATAAGAGC	64	0.07	0.01646	3		0	no
ATAAGCAACAT	5	0.8	1e-05	1		NA	yes
ATAAGCACTA	6	0.6	2e-05	25		0	no
ATAAGCCATA	6	1	<E-05	5		0	no
ATAAGGAC	55	0.09	0.00116	39		0.0869565	no
ATAAGGAG	53	0.13	<E-05	3		0.104478	no
ATAAGGAGA	28	0.16	0.00014	35		0.166667	no
ATAAGGG	216	0.08	0.00366	3		0.261905	yes
ATAAGGGC	18	0.14	0.00268	37		0.097561	no
ATAAGGGG	65	0.18	<E-05	19		0.4375	yes
ATAAGGGGA	25	0.17	1e-05	3	MSN4	0.6	yes
ATAAGGGGTT	7	0.62	1e-05	34	ADR1	0.333333	yes
ATAAGTATTC	6	0.4	0.00118	39		0	no
ATAAGTGATGA	13	0.31	3e-05	8		0	no
ATAATACAATA	7	0.48	<E-05	3		0	no
ATAATAGG	68	0.06	0.06862	3		0.0733945	no
ATAATAGGAG	6	0.47	7e-05	39		0.142857	no
ATAATATGAAT	6	0.67	<E-05	17		0	no
ATAATCATA	29	0.1	0.00114	20		0.0566038	no
ATAATCATTGC	6	0.67	<E-05	39		0.2	no
ATAATCCGA	9	0.31	0.0002	1	RGT1	0.142857	no
ATAATGTCACA	8	0.36	9e-05	39		0.25	yes
ATAATTCTT	40	0.11	0.00019	3		0.0727273	no
ATACAACG	24	0.1	0.00373	20		0.0153846	no
ATACAAGC	51	0.06	0.06862	3		0.0649351	no
ATACAAGTA	27	0.1	0.0039	3		0.0909091	no
ATACAATC	52	0.06	0.06862	3		0.0421053	no
ATACACAC	75	0.08	0.00382	3		0.0512821	no
ATACACCCA	10	0.24	0.00316	28		0	no
ATACACTCC	11	0.25	0.00045	37		0	no
ATACACTCGG	6	0.67	<E-05	39		0	no
ATACACTCGGA	6	0.67	<E-05	39		0	no
ATACAGAAAC	10	0.56	<E-05	33		0.2	no
ATACAGAG	58	0.09	0.00116	39		0.0135135	no
ATACAGTT	88	0.08	0.00382	3		0.045045	no
ATACAGTTTT	26	0.15	0.00037	8		0.0555556	no
ATACATAAA	62	0.1	0.00014	3		0.0666667	no
ATACATAAAA	29	0.15	2e-05	1		0.0731707	no
ATACATGT	75	0.09	0.0007	3		0.0614035	no
ATACCACAACA	5	0.8	1e-05	1		0	no
ATACCCAC	23	0.06	0.15474	3		0.0571429	no
ATACCCC	59	0.08	0.00366	3		0.104651	no
ATACCCCT	18	0.2	0.00019	29	ADR1	0.0434783	no
ATACCCGAT	6	0.67	<E-05	19		0	no
ATACCGG	58	0.07	0.01652	3	UGA3	0.142857	no
ATACCGTG	31	0.06	0.13874	3		0.0357143	no
ATACCTTC	43	0.08	0.00603	3	MOT3	0.0166667	no
ATACCTTCA	16	0.17	0.00084	3	MOT3	0	no
ATACGAAC	35	0.08	0.01303	3		0.0307692	no
ATACGACAT	18	0.12	0.01374	7		0	no
ATACGATAT	24	0.16	5e-05	39		0.0645161	no
ATACGCCAAA	9	0.33	0.00041	7		0.25	yes
ATACGGG	69	0.08	0.00366	3		0.0243902	no
ATACGGGA	21	0.12	0.0029	3		0	no
ATACGGGAT	8	0.29	0.0006	3		0	no
ATACGGGT	22	0.06	0.19576	3		0	no
ATACGTCT	38	0.06	0.09636	3		0	no
ATACGTGAAA	10	0.44	<E-05	27		0.111111	no
ATACTAGTG	14	0.29	6e-05	7		0.0625	no
ATACTCCA	36	0.1	0.00121	3	ADR1	0.0212766	no
ATACTGTG	55	0.06	0.06862	3		0.0240964	no
ATACTTATTTT	7	0.52	5e-05	16		0	no
ATACTTGTTA	8	0.57	<E-05	18		0.125	no
ATACTTTCAT	10	0.33	0.00045	23		0	no
ATACTTTGAAC	9	0.42	<E-05	1		0	no
ATAGCTC	45	0.08	0.01487	37		0.0263158	no
ATAGCTCA	29	0.08	0.02202	3		0.0487805	no
ATAGCTCATC	9	0.47	2e-05	7		0.166667	no
ATAGGAG	128	0.06	0.06893	3		0.108808	no
ATAGGAGT	33	0.12	0.0003	1	ADR1	0.0408163	no
ATAGGATG	33	0.09	0.00506	3		0.0232558	no
ATAGGCTTG	10	0.29	0.00027	24		0	no
ATAGGGA	124	0.06	0.06893	3		0.0652174	no
ATAGGGAG	29	0.11	0.00201	1		0.0789474	no
ATAGGGGTC	5	1	<E-05	4	ADR1	0.6	yes
ATAGGGTT	36	0.11	0.0003	3		0.0526316	no
ATAGGGTTG	9	0.56	1e-05	13		0	no
ATAGGTGT	40	0.06	0.09827	3		0.0392157	no
ATAGTAGA	79	0.07	0.01646	3		0.0363636	no
ATAGTCCGC	7	0.33	0.00273	29	RGT1	0.428571	yes
ATATAAAAGA	41	0.12	7e-05	1		0.108696	no
ATATAAGATG	18	0.25	2e-05	34		0.272727	yes
ATATAAGG	114	0.08	0.00382	3		0.135135	no
ATATAAGGAG	12	0.38	<E-05	35		0.333333	yes
ATATAAGGG	38	0.16	5e-05	23		0.333333	yes
ATATACCGG	10	0.29	0.00029	3		0	no
ATATACGAATT	5	0.8	1e-05	1		0	no
ATATACTC	93	0.08	0.00382	3		0.018018	no
ATATACTCA	27	0.14	0.00014	3		0.0357143	no
ATATATGTC	39	0.11	0.00019	39		0.0212766	no
ATATATGTCT	21	0.19	4e-05	39		0	no
ATATATTCTAG	6	0.67	<E-05	39		0	no
ATATCAACAC	7	0.48	1e-05	31		0.2	no
ATATCCCC	24	0.07	0.07497	3		0	no
ATATCCGTGG	6	0.67	<E-05	39		0	no
ATATCCGTGGA	6	0.67	<E-05	39		0	no
ATATCGGCGC	5	1	<E-05	13		0	no
ATATCGGCGCA	5	1	<E-05	13		0	no
ATATCGTA	66	0.08	0.00382	3		0.0842105	no
ATATCGTTTG	6	0.67	<E-05	16		0.181818	no
ATATCTATAAT	6	0.67	<E-05	5		0	no
ATATCTTAG	22	0.25	1e-05	17		0.1	no
ATATGAAG	91	0.07	0.01646	3		0.0384615	no
ATATGAGGGT	9	0.47	1e-05	35		0.5	yes
ATATGCGA	38	0.08	0.03373	16		0.0701754	no
ATATGTGA	41	0.12	8e-05	26		0.0307692	no
ATATGTTGT	23	0.15	2e-05	20		0	no
ATATTCCTT	42	0.12	2e-05	3		0.0983607	no
ATATTCTAG	26	0.14	0.00014	1		0.0454545	no
ATATTCTAGTA	6	0.73	<E-05	1		0	no
ATATTGTC	45	0.05	0.42473	16		0.0194175	no
ATATTGTTCA	16	0.24	1e-05	1		0.230769	no
ATATTGTTCAT	10	0.49	<E-05	1		0.5	yes
ATATTTAAG	51	0.1	0.00014	3		0.0298507	no
ATATTTCATAG	5	0.8	1e-05	39		0	no
ATATTTGAGA	12	0.32	<E-05	25		0	no
ATATTTTTCC	36	0.16	2e-05	7		0.0714286	no
ATCAAATGG	26	0.2	<E-05	24		0.0357143	no
ATCAAGGGG	6	0.27	0.00598	40		0.142857	no
ATCAATCTCTT	5	0.8	1e-05	1		0	no
ATCAATGT	54	0.08	0.00382	3		0	no
ATCACAATTAG	5	1	<E-05	33	YHP1	0	no
ATCACAT	219	0.07	0.01652	3		0.0564972	no
ATCACATATT	10	0.27	0.00031	14		0.142857	no
ATCACATC	45	0.1	0.00038	3		0.0135135	no
ATCACATT	75	0.07	0.01646	3		0.0420168	no
ATCACCTA	30	0.08	0.0221	3		0.0909091	no
ATCACCTGGA	6	0.53	7e-05	39		0	no
ATCACCTGGAG	5	0.8	1e-05	1		NA	yes
ATCACTGTT	10	0.36	2e-05	37		0	no
ATCAGACG	14	0.15	0.00523	1		0	no
ATCAGCAG	44	0.11	9e-05	3	SWI5	0.09375	no
ATCAGCCG	20	0.21	7e-05	40	SWI5	0.0384615	no
ATCAGCCGC	11	0.44	1e-05	10	SWI5	0	no
ATCAGCTT	53	0.08	0.00382	3		0.015625	no
ATCAGGAC	16	0.11	0.01399	3		0	no
ATCAGGCGTC	7	0.48	2e-05	39		0	no
ATCAGGCGTCG	6	0.67	<E-05	39		0	no
ATCAGGCT	20	0.11	0.00804	3		0	no
ATCAGTAGCAG	7	0.48	2e-05	39		0	no
ATCAGTGCC	7	0.48	<E-05	3		0	no
ATCATACA	69	0.08	0.00382	3		0.0309278	no
ATCATAGCA	9	0.22	0.00361	39		0.0666667	no
ATCATATG	64	0.08	0.00382	3		0.0430108	no
ATCATCACC	7	0.38	0.00121	30		0.0909091	no
ATCATCCA	40	0.09	0.00224	3		0.0535714	no
ATCATCCG	25	0.13	0.00052	3	RGT1	0.0322581	no
ATCATCTTCAT	6	0.53	7e-05	39		0	no
ATCATGACATA	5	1	<E-05	31		0	no
ATCATGATC	9	0.42	<E-05	39		0.125	no
ATCATTCAAT	8	0.43	2e-05	39		0	no
ATCATTGCACA	6	0.67	<E-05	39		0.142857	no
ATCATTTCTCC	6	0.67	<E-05	39		0.181818	no
ATCCACC	73	0.07	0.01652	3		0.0707071	no
ATCCACCA	11	0.13	0.02276	37		0.162162	no
ATCCACCC	9	0.33	0.00017	3		0.047619	no
ATCCACTC	25	0.1	0.00734	3		0.0285714	no
ATCCATGC	12	0.06	0.38695	25		0	no
ATCCATTA	54	0.07	0.01646	3		0	no
ATCCCAAA	56	0.09	0.00116	39		0.0461538	no
ATCCCAAG	21	0.22	7e-05	15		0.04	no
ATCCCAAGA	10	0.4	7e-05	15		0	no
ATCCCACT	49	0.08	0.00327	3		0	no
ATCCCCCTC	8	0.18	0.01595	16	ADR1	0.333333	yes
ATCCCCTG	18	0.2	0.00023	40	MSN4	0.0952381	no
ATCCCCTT	48	0.15	<E-05	3	MSN4	0.0909091	no
ATCCCCTTT	20	0.1	0.05799	27	MSN4	0.115385	no
ATCCCGA	60	0.07	0.01652	3		0.0746269	no
ATCCCGAA	27	0.09	0.01131	3		0.148148	no
ATCCCGTC	27	0.11	0.00189	3		0	no
ATCCCTAC	10	0.22	0.00217	1		0.1	no
[truncated: 6,612 more rows]
